# Supplementary material for: Photo-and thermoresponsive N-salicylideneaniline derivatives: solid-state studies and structural aspects
Source: Royal Society of Chemistry journal article supplement (doi:10.1039/d1nj03056f), 2022-01-01
Supplement: d1nj03056f1.pdf [file d1nj03056f1.pdf]

**New Journal of Chemistry**

**Supporting Information**

**Photo-and Thermoresponsive *N*-Salicylideneaniline Derivatives: Solid-State Studies and Structural Aspects**

# Photo-and Thermoresponsive *N*-Salicylideneaniline Derivatives: Solid-State Studies and Structural Aspects

Siya T. Hulushe,<sup>\*a</sup> Frederick P. Malan,<sup>b</sup> Eric C. Hosten,<sup>c</sup> Kevin A. Lobb,<sup>a</sup> Setshaba D. Khanye<sup>d</sup> and Gareth M. Watkins<sup>a</sup>

<sup>a</sup> Department of Chemistry, Rhodes University, P.O. Box 94, Makhanda 6139, South Africa

<sup>b</sup> Department of Chemistry, University of Pretoria, 02 Lynnwood Road, Hatfield, Pretoria, 0002, South Africa

<sup>c</sup> Department of Chemistry, Nelson Mandela University, Summerstrand, P.O. Box 77000, Gqeberha 6031, South Africa

<sup>d</sup> Faculty of Pharmacy, Rhodes University, P.O. Box 94, Makhanda 6139, South Africa

## Corresponding authors

\* hulushesiya@gmail.com

## Table of Content

|                                                                                                                |     |
|----------------------------------------------------------------------------------------------------------------|-----|
| <b>1. Mechanosyntheses and Powder X-ray diffraction (PXRD) patterns (Figure S1)</b>                            | S2  |
| <b>2. Electron Density Maps (Figure S2–S4, Table S1–S2 and Scheme S1)</b>                                      | S6  |
| <b>3. Thermochromic Compounds (Figure S5)</b>                                                                  | S16 |
| <b>4. Variable Temperature Single-Crystal X-ray Diffraction Studies (Table S3–S7)</b>                          | S17 |
| <b>5. Calculation of Thermal Expansion Coefficient by <i>PASCal</i> Program (Table S8)</b>                     | S22 |
| <b>6. Fourier-Transform Infrared (IR) Absorption Spectroscopy (Figure S6)</b>                                  | S23 |
| <b>7. Liquid-State <sup>1</sup>H, <sup>13</sup>C Nuclear Magnetic Resonance (NMR) Spectroscopy (Figure S7)</b> | S24 |
| <b>8. Mass Spectroscopy (Figure S8)</b>                                                                        | S32 |
| <b>9. Solid-State Absorption Ultraviolet-visible Spectroscopy (Figure S9)</b>                                  | S36 |
| <b>10. Differential Scanning Calorimetry (DSC) Measurements (Figure S10)</b>                                   | S37 |
| <b>11. References</b>                                                                                          | S37 |

## 1. Mechanochemical Syntheses and Powder X-ray Diffraction (PXRD)

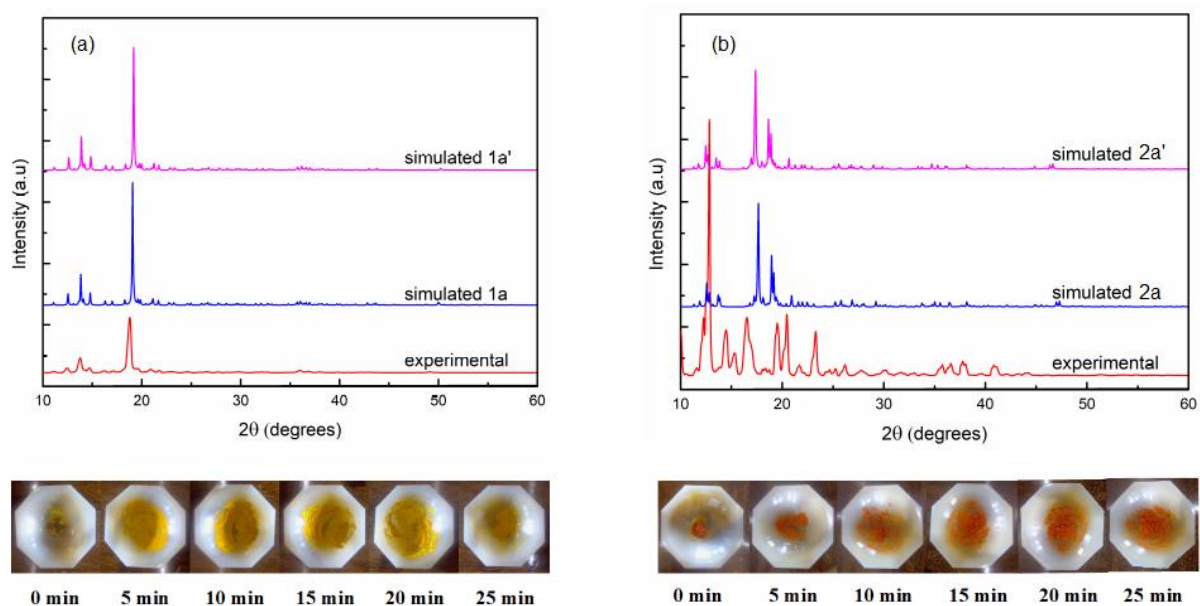

**Figure S1(a).** Simulated and experimental PXRD patterns (at 298 K) of (a) **1** and (b) **2** along with their respective photographs of the grinding experiments (bottom images). There are few discrepancies in (b) possibly indicating the absence of water of crystallisation as the powdered sample of compound **2** is assumed to contain no waters. The mechanochemical syntheses of **1** and **2** were carried out as follows: equimolar (1.0 mmol) amounts of 5-nitrosalicylaldehyde (yellow crystalline solid) and 2-aminophenol (dark brown crystalline powder) for **1** and *o*-anisidine (colourless liquid) for **2** were used to obtain 2-((*E*)-(2-hydroxyphenylimino)methyl)-4-nitrophenol and 2-((*E*)-(2-methoxyphenylimino)methyl)-4-nitrophenol, respectively. Neat grinding (NG) in an agate mortar lead to the formation of a yellow sample and an orange moist paste which then started to solidify after 5 minutes in the case of compound **2** and were respectively obtained in 70% and 68% yields.

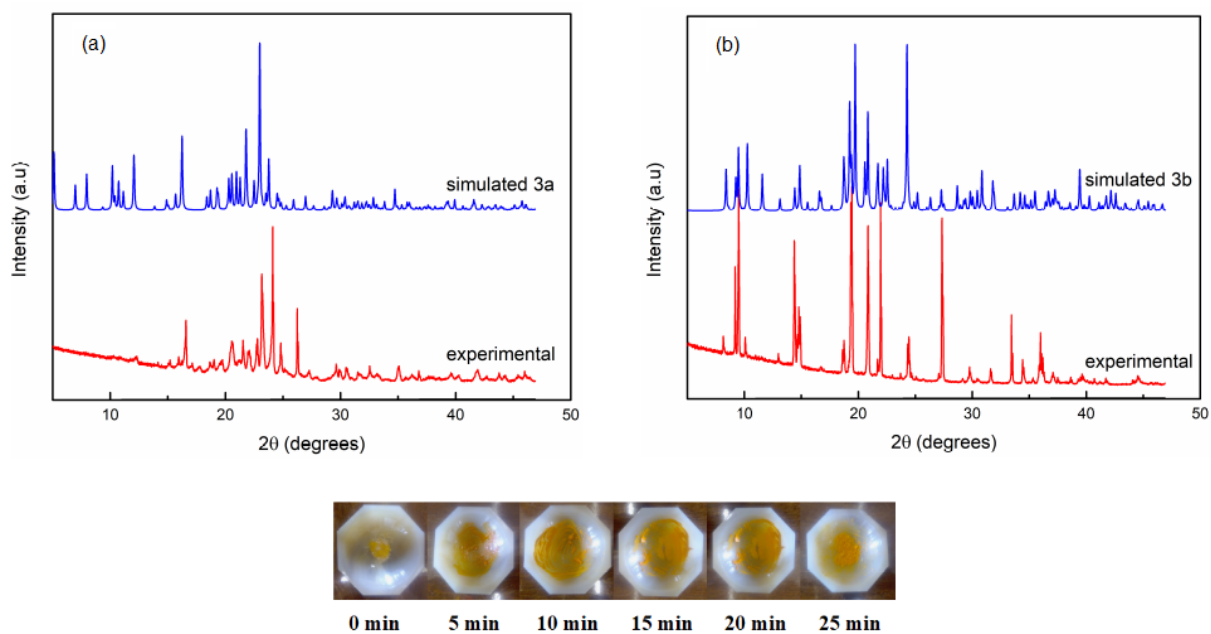

**Figure S1(b).** Simulated and experimental PXRD patterns (at 298 K) of (a) **3a** and (b) **3b** along with photographs of the grinding experiments (bottom image) for compound **3**. There are few discrepancies in (a) possibly indicating some impurities present or the presence of ethyl acetate as solvent of crystallisation. The mechanochemical synthesis of compound **3** was carried out as follows: equimolar (1.0 mmol) amounts of 5-nitrosalicylaldehyde (yellow crystalline solid) and 2-bromoaniline (colourless crystals) were used in order to obtain 2-((*E*)-(2-bromophenylimino)methyl)-4-nitrophenol. Neat grinding (NG) in an agate mortar lead an orange moist paste which then started to solidify after 10 minutes and the orange crystalline solid was obtained in 67% yields.

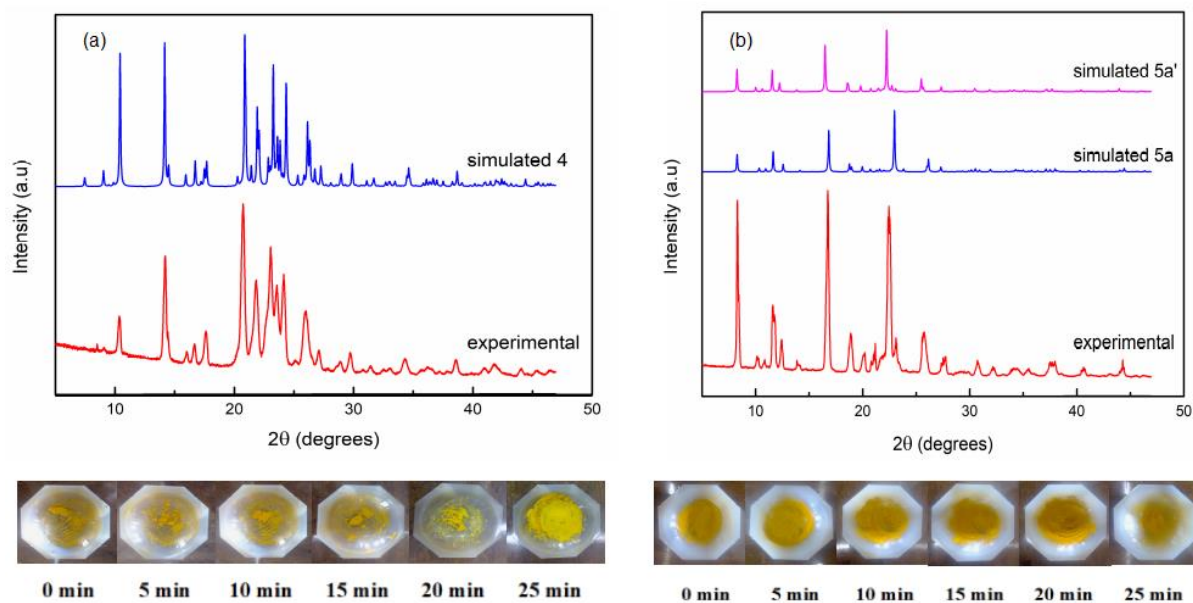

**Figure S1(c).** Simulated and experimental PXRD patterns (at 298 K) of (a) **4** and (b) **5** along with their photographs of the grinding experiments (bottom image) for both compounds. The mechanochemical syntheses of **4** and **5** were carried out as follows: equimolar (1.0 mmol) amounts of 5-nitrosalicylaldehyde (yellow crystalline solid) and 3-chloroaniline for **4** and 3-trifluoromethylaniline (both colourless liquids) for **5** were used to obtain 2-((*E*)-(3-chlorophenylimino)methyl)-4-nitrophenol and 2-((*E*)-(3-(trifluoromethyl)phenylimino)methyl)-4-nitrophenol, respectively. Neat grinding (NG) in an agate mortar lead to the formation of a yellow moist paste (started to solidify after 20 minutes in the case of compound **4**) and orange-yellow powdered product of compound **5** and were obtained in 61% and 59% yields, respectively.

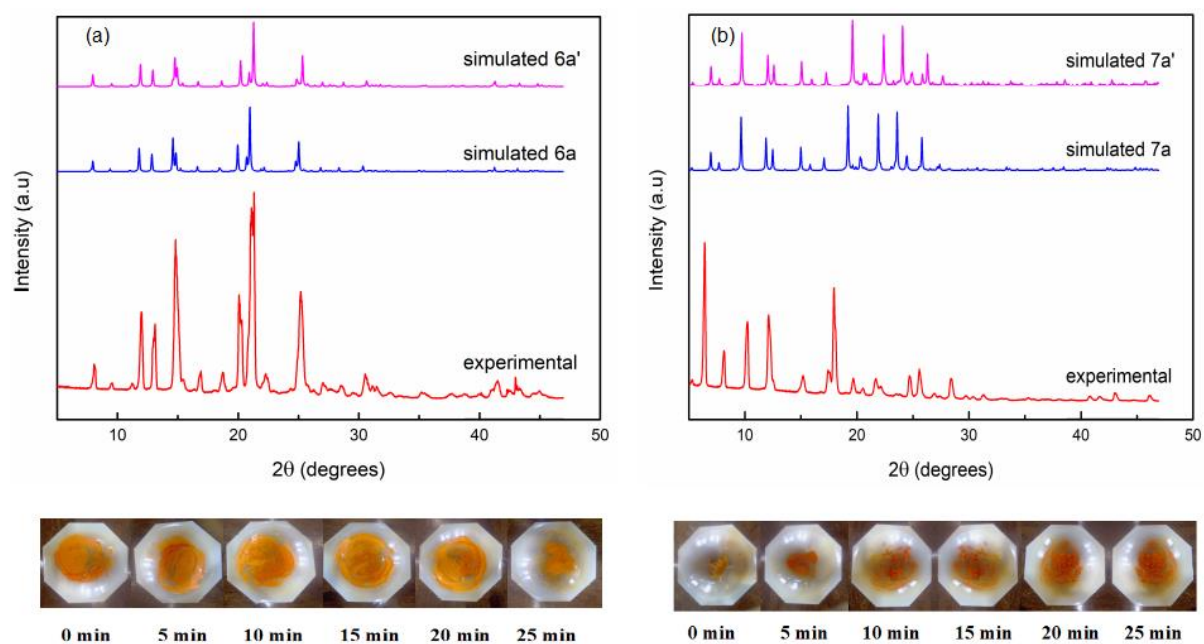

**Figure S1(d).** Simulated and experimental PXRD patterns (at 298 K) of (a) **6** and (b) **7** along with their photographs of the grinding experiments (bottom image) for both compounds. The mechanochemical syntheses of **6** and **7** were carried out as follows: equimolar (1.0 mmol) amounts of 5-nitrosalicylaldehyde (yellow crystalline solid) and *p*-toluidine (dark purple solid) for **6** and *p*-anisidine (purple crystalline powder) for **7** were used to obtain 2-((*E*)-(*p*-tolylimino)methyl)-4-nitrophenol and 2-((*E*)-(4-methoxyphenylimino)methyl)-4-nitrophenol, respectively. Neat grinding (NG) in an agate mortar lead to the formation of a yellow sample and an orange moist paste which then started to solidify after 5 minutes in the case of compound **7** and were respectively obtained in 63% and 57% yields.

## 2. Electron Difference Maps

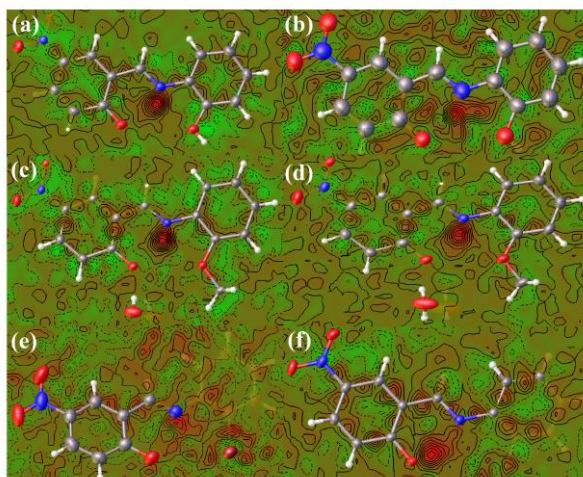

**Figure S2.** Electron difference maps showing the location of the H1 atom involved in intramolecular hydrogen bond in compounds (a) **1\_LT**; (b) **1\_RT**; (c) **2\_LT**; (d) **2\_RT**; (e) **3a\_RT** and (f) **3b\_LT**. Hydrogen atoms are shown as off-white spheres with 0.2 Å radius.

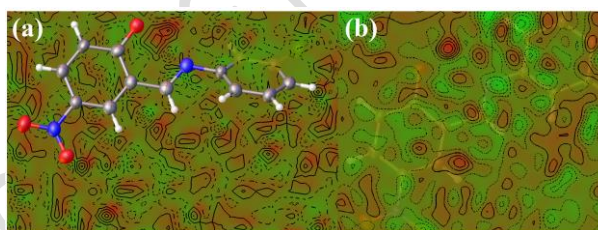

**Figure S3.** Electron difference maps showing the location of the H1 atom involved in intramolecular hydrogen bond in compounds (a) **4\_LT** and (b) **5\_RT**. Hydrogen atoms are shown as off-white spheres with 0.2 Å radius.

The location of the hydrogen atoms at either the nitrogen or oxygen atoms were determined both from electron density map and, the **KA** ( $d(N1-H1)$ ) and **EI** ( $d(O1-H1)$ ) bond lengths along with strong intramolecular hydrogen bonds between O1 and N1 atoms with their respective  $O\cdots H/N\cdots H$  bond distances are discussed. The molecular conformation in all the structures is described by the relative orientation of the torsion angles: **T $\alpha$**  [ $\angle C1-N1-C21-C26$ ] and **T $\beta$**  [ $\angle N1-C1-C11-C12$ ] (**Scheme S1**). Generally, the torsion angle in both tautomeric forms is defined by the  $\angle N1-H1\cdots O1$  and  $\angle N1\cdots H1-O1$  angles which force the fragment to adopt planarity usually with a value close to zero degrees. The dihedral angle ( $\phi$ ) between the aromatic ring units, packing indices, and the  $\phi$  value related to the solid-state thermo- and photochromic processes of all the compounds are presented.

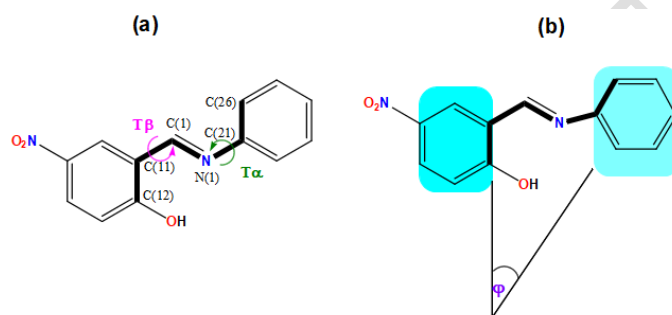

**Scheme S1.** (a) Definition of the **T $\alpha$**  ( $\angle C1-N1-C21-C26$ : green) and **T $\beta$**  ( $\angle N1-C1-C11-C12$ : magenta) torsion angles in the *N*-salicylideneaniline derivatives; (b) The  $\phi$  dihedral angle formed by the two six-membered (highlighted blue regions) rings.



**Table S1:** Selected geometric parameters of hydrogen bonds and, graph-set assignments exhibited by intra- and intermolecular interactions (calculated using Platon<sup>1</sup>) in compounds **1–2**.

| D-H...A                       | d(D-H) / (Å) | d(H...A) / (Å) | d(D-A) / (Å) | ∠(D-H...A) / ° | Graph-set motifs |
|-------------------------------|--------------|----------------|--------------|----------------|------------------|
| <b>1_LT</b>                   |              |                |              |                |                  |
| N1–H1...O4 <sup>i</sup>       | 0.8800(1)    | 2.183(1)       | 2.596(1)     | 108.2(1)       |                  |
| N1–H1...O1 <sup>i</sup>       | 0.8800(1)    | 1.896(1)       | 2.607(1)     | 136.6(1)       | $S_1^1(6)$       |
| C1–H1A...O3 <sup>ii</sup>     | 0.9499(2)    | 2.314(2)       | 3.197(2)     | 154.5(1)       | $R_2^2(10)$      |
| C16–H16...O3 <sup>ii</sup>    | 0.9500(2)    | 2.564(2)       | 3.384(2)     | 144.7(1)       | $R_2^2(14)$      |
| O4–H4...H1 <sup>iii</sup>     | 0.8570(2)    | 1.725(2)       | 2.565(1)     | 165.6(2)       | $R_2^2(18)$      |
| C25–H25...O2 <sup>iv</sup>    | 0.9500(2)    | 2.592(2)       | 3.201(2)     | 122.2(1)       | –                |
| <b>1_RT</b>                   |              |                |              |                |                  |
| N1–H1...O1 <sup>i</sup>       | 0.860(6)     | 1.907(6)       | 2.601(6)     | 136.8(5)       | $S_1^1(6)$       |
| C1–H1A...O3 <sup>ii</sup>     | 0.9297(7)    | 2.334(6)       | 3.202(6)     | 155.2(5)       | $R_2^2(10)$      |
| C16–H16...O3 <sup>ii</sup>    | 0.9310(7)    | 2.576(6)       | 3.376(6)     | 144.4(5)       | $R_2^2(14)$      |
| O4–H4...H1 <sup>iii</sup>     | 0.8304(5)    | 1.800(4)       | 2.576(5)     | 158.0(3)       | $R_2^2(18)$      |
| C25–H25...O2 <sup>v</sup>     | 0.9310(7)    | 2.583(6)       | 3.180(6)     | 122.4(5)       | –                |
| <b>2_LT</b>                   |              |                |              |                |                  |
| N1–H1...O4 <sup>i</sup>       | 0.8799(2)    | 2.136(2)       | 2.570(2)     | 109.7(1)       | $S_1^1(6)$       |
| N1–H1...O1 <sup>i</sup>       | 0.8799(2)    | 1.815(2)       | 2.556(2)     | 140.6(2)       | $S_1^1(6)$       |
| O5W–H5WA...O1 <sup>i</sup>    | 0.8700(3)    | 2.020(3)       | 2.887(2)     | 177.0(3)       | $R_2^4(8)$       |
| O6W–H6WA...O1 <sup>i</sup>    | 0.8700(4)    | 2.000(5)       | 2.865(2)     | 175.0(5)       | $R_2^4(8)$       |
| C1–H1A...O5W <sup>vi</sup>    | 0.9500(2)    | 2.564(2)       | 3.288(2)     | 133.2(2)       | –                |
| C16–H16...O6W <sup>vii</sup>  | 0.9500(2)    | 2.530(2)       | 3.254(2)     | 133.1(2)       | –                |
| C23–H23...O2 <sup>viii</sup>  | 0.9500(2)    | 2.381(2)       | 3.329(2)     | 175.2(2)       | –                |
| O6W–H6WA...Cg(1) <sup>j</sup> | 0.8698(2)    | 2.867(6)       | 3.661(1)     | 152.5(6)       | –                |
| C27–H27A...O3 <sup>vi</sup>   | 0.9800(5)    | 2.653(4)       | 3.591(2)     | 160.3(6)       | $R_2^2(24)$      |
| <b>2_RT</b>                   |              |                |              |                |                  |
| N1–H1...O4 <sup>i</sup>       | 0.8600(2)    | 2.149(2)       | 2.574(2)     | 110.1(1)       | $S_1^1(6)$       |
| N1–H1...O1 <sup>i</sup>       | 0.8600(2)    | 1.833(2)       | 2.559(2)     | 140.9(2)       | $S_1^1(6)$       |
| O5W–H5WA...O1 <sup>i</sup>    | 0.8399(4)    | 2.060(4)       | 2.873(2)     | 163.0(5)       | $R_2^4(8)$       |
| O5W–H5WB...O1 <sup>ix</sup>   | 0.8601(4)    | 2.100(5)       | 2.873(2)     | 151.0(7)       | $R_2^4(8)$       |

**Table S1:** (continues...) Selected geometric parameters of hydrogen bonds and, graph-set assignments exhibited by intra-and intermolecular interactions (calculated using Platon<sup>1</sup>) in compounds **3–5**.

| D-H...A                      | d(D-H) / (Å) | d(H...A) / (Å) | d(D-A) / (Å) | ∠(D-H...A) / ° | Graph-set motifs |
|------------------------------|--------------|----------------|--------------|----------------|------------------|
| <b>3a_RT</b>                 |              |                |              |                |                  |
| O1–H1...N1 <sup>i</sup>      | 0.8399(1)    | 1.858(1)       | 2.603(2)     | 147.0(1)       | $S_1^1(6)$       |
| C26–H26...O3 <sup>x</sup>    | 0.9300(2)    | 2.466(2)       | 3.250(2)     | 142.0(2)       | $R_2^2(9)$       |
| C1–H1A...O2 <sup>x</sup>     | 0.9300(2)    | 2.668(2)       | 3.521(2)     | 149.8(1)       | $R_2^2(9)$       |
| <b>3b_LT</b>                 |              |                |              |                |                  |
| N1–H1...O1 <sup>i</sup>      | 0.8600(2)    | 1.916(2)       | 2.608(2)     | 136.5(2)       | $S_1^1(6)$       |
| N1–H1...Br1 <sup>i</sup>     | 0.8600(2)    | 2.586(2)       | 3.040(2)     | 114.1(2)       | $S_1^1(5)$       |
| C26–H26...O3 <sup>x</sup>    | 0.9300(3)    | 2.481(3)       | 3.273(3)     | 143.2(2)       | $R_2^2(9)$       |
| C1–H1A...O2 <sup>x</sup>     | 0.9300(3)    | 2.715(3)       | 3.557(3)     | 150.8(3)       | $R_2^2(9)$       |
| <b>4_LT</b>                  |              |                |              |                |                  |
| O1–H1...N1 <sup>i</sup>      | 0.8340(2)    | 1.835(2)       | 2.601(3)     | 151.9(4)       | $S_1^1(6)$       |
| C16–H16...O3 <sup>xii</sup>  | 0.9500(1)    | 2.460(7)       | 3.329(5)     | 152.0(1)       | $R_2^2(10)$      |
| C22–H22...O3 <sup>xiii</sup> | 0.9500(3)    | 2.679(2)       | 3.564(2)     | 155.3(7)       |                  |
| <b>4_RT</b>                  |              |                |              |                |                  |
| O1–H1...N1 <sup>i</sup>      | 0.8200(2)    | 1.874(3)       | 2.605(2)     | 147.9(5)       | $S_1^1(6)$       |
| C16–H16...O3 <sup>i</sup>    | 0.9300(4)    | 2.510(1)       | 3.364(5)     | 152.6(1)       | $R_2^2(10)$      |
| C22–H22...O3 <sup>xiv</sup>  | 0.9300(1)    | 2.635(4)       | 3.553(8)     | 169.3(8)       |                  |
| <b>5_LT</b>                  |              |                |              |                |                  |
| O1–H1...N1 <sup>i</sup>      | 0.9001(4)    | 1.786(0)       | 2.614(2)     | 151.1(4)       | $S_1^1(6)$       |
| C1–H1A...O3 <sup>xvi</sup>   | 0.9500(3)    | 2.414(3)       | 3.297(3)     | 154.6(2)       | $R_2^2(14)$      |
| C16–H16...O3 <sup>xvi</sup>  | 0.9499(3)    | 2.583(3)       | 3.427(3)     | 148.2(2)       | $R_2^2(10)$      |
| <b>5_RT</b>                  |              |                |              |                |                  |
| O1–H1...N1 <sup>i</sup>      | 0.8100(4)    | 1.890(4)       | 2.616(3)     | 150.0(4)       | $S_1^1(6)$       |
| C1–H1A...O3 <sup>xvi</sup>   | 0.9300(3)    | 2.440(1)       | 3.317(4)     | 157.0(0)       | $R_2^2(14)$      |
| C16–H16...O3 <sup>xvi</sup>  | 0.9500(3)    | 2.583(1)       | 3.427(0)     | 148.2(1)       | $R_2^2(10)$      |

**Table S1** (continue). Selected geometric parameters of hydrogen bonds and, graph-set assignments exhibited by intra-and intermolecular interactions (calculated using Platon<sup>1</sup>) in compounds **6–7**.

| D-H...A                        | d(D-H) / (Å) | d(H...A) / (Å) | d(D-A) / (Å) | ∠(D-H...A) / ° | Graph-set motifs |
|--------------------------------|--------------|----------------|--------------|----------------|------------------|
| <b>6_LT</b>                    |              |                |              |                |                  |
| N1–H1...O1 <sup>i</sup>        | 0.9400(3)    | 1.915(6)       | 2.558(1)     | 155.2(3)       | $S_1^1(6)$       |
| O1–H1...N1 <sup>i</sup>        | 0.7750(6)    | 1.671(3)       | 2.558(1)     | 140.1(6)       | $S_1^1(6)$       |
| C16–H16...O3 <sup>xix</sup>    | 0.9500(2)    | 2.568(2)       | 3.340(2)     | 138.6(1)       | $R_2^2(10)$      |
| C1–H1A...O3 <sup>xix</sup>     | 0.9500(2)    | 2.664(2)       | 3.376(2)     | 132.1(1)       | $R_2^2(14)$      |
| C26–H26...O1 <sup>xx</sup>     | 0.9500(2)    | 2.664(1)       | 3.567(1)     | 158.8(1)       | –                |
| C27–H27B...O3 <sup>xxi</sup>   | 0.9800(7)    | 2.692(5)       | 3.633(2)     | 161.0(5)       | –                |
| C27–H27C...O2 <sup>xxii</sup>  | 0.9800(6)    | 2.630(4)       | 3.394(2)     | 135.0(5)       | –                |
| <b>6_RT</b>                    |              |                |              |                |                  |
| N1–H1...O1 <sup>i</sup>        | 1.3910(4)    | 1.260(4)       | 2.559(2)     | 149.8(4)       | $S_1^1(6)$       |
| O1–H1...N1 <sup>i</sup>        | 1.2600(4)    | 1.391(4)       | 2.559(2)     | 149.8(4)       | $S_1^1(6)$       |
| C16–H16...O3 <sup>xix</sup>    | 0.9300(2)    | 2.617(2)       | 3.374(2)     | 139.0(1)       | $R_2^2(10)$      |
| C1–H1A...O3 <sup>xix</sup>     | 0.9300(2)    | 2.707(2)       | 3.408(2)     | 132.8(1)       | $R_2^2(14)$      |
| C22–H22...O1 <sup>xx</sup>     | 0.9300(2)    | 2.714(2)       | 3.597(2)     | 158.9(1)       | –                |
| C27–H27C...O2 <sup>xxii</sup>  | 0.9600(7)    | 2.677(5)       | 3.418(3)     | 134.4(7)       | $R_2^2(18)$      |
| <b>7_LT</b>                    |              |                |              |                |                  |
| N1–H1...O1 <sup>i</sup>        | 1.4543(4)    | 1.158(4)       | 2.545(4)     | 153.8(3)       | $S_1^1(6)$       |
| C27–H27B...O2 <sup>xxv</sup>   | 0.9810(7)    | 2.555(9)       | 3.279(3)     | 130.5(6)       | –                |
| C14–H14...O4 <sup>xxvi</sup>   | 0.9500(3)    | 2.563(2)       | 3.451(2)     | 155.6(2)       | $R_2^2(8)$       |
| C1–H1A...O3 <sup>xxvii</sup>   | 0.9500(3)    | 2.431(2)       | 3.283(2)     | 149.1(2)       | $R_2^2(14)$      |
| C16–H16...O3 <sup>xxviii</sup> | 0.9500(3)    | 2.583(2)       | 3.401(3)     | 144.6(2)       | $R_2^2(10)$      |
| <b>7_RT</b>                    |              |                |              |                |                  |
| N1–H1...O1 <sup>i</sup>        | 1.4590(2)    | 1.1504(2)      | 2.558(1)     | 156.2(2)       | $S_1^1(6)$       |
| C27–H27B...O2 <sup>iv</sup>    | 0.9600(4)    | 2.606(6)       | 3.510(1)     | 132.5(4)       | –                |
| C14–H14...O4 <sup>xxix</sup>   | 0.9300(2)    | 2.640(1)       | 3.330(2)     | 156.0(1)       | $R_2^2(8)$       |
| C16–H16...O3 <sup>xxviii</sup> | 0.9300(2)    | 2.631(1)       | 3.433(1)     | 144.7(1)       | $R_2^2(10)$      |
| C1–H1A...O3 <sup>xxviii</sup>  | 0.9301(2)    | 2.454(2)       | 3.296(2)     | 150.5(1)       | $R_2^2(14)$      |

**Symmetry codes:** (i) x, y, z; (ii) 2-x, 1-y, 1-z; (iii) -x, 1-y, 2-z; (iv) 3/2-x, -1/2+y, 3/2-z; (v) 3/2-x, 1/2+y, 3/2-z; (vi) 1-x, 1-y, 1-z; (vii) 1-x, -y, 1-z; (viii) 1/2+x, 1/2+y, z; (ix) 1-x, y, 1/2-z; (x) 1-x, -1/2+y, 1/2-z; (xi) 2-x, -1/2+y, 3/2-z; (xii) 1-x, 1-y, -z; (xiii) 2-x, 1-y, -z; (xiv) 2-x, 2-y, 1-z; (xv) 1-x, 2-y, 1-z; (xvi) 1-x, y, 1-z; (xvii) x, y, 1+z; (xviii) 2-x, y, 1-z; (xix) 1-x, 1-y, 2-z; (xx) x, y, -1+z; (xxi) -1+x, y, z; (xxii) -1+x, y, -1+z; (xxiii) x, 3/2-y, -1/2+z; (xxiv) x, 3/2-y, 1/2+z; (xxv) 1/2-x, 1/2+y, 1/2-z; (xxvi) 3/2-x, -1/2+y, 1/2-z; (xxvii) -x, 1-y, -z; (xxviii) 2-x, 1-y, 2-z.

**Table S2:** Selected bond lengths, torsion angles of ( $\angle N1-C1-C11$ ), ( $T\alpha$ : [ $\angle C1-N1-C21-C26$ ] and  $T\beta$ : [ $\angle N1-C1-C11-C12$ ]) units, dihedral angles ( $\phi$ ) between the planes of the terminal phenyl rings (calculated using Mercury<sup>2</sup>) and packing indices of the molecules (calculated using Platon<sup>1</sup>).

| Compound | C1-N1 [Å] | C12-O1 [Å] | $\angle Tor.$ [°] | $T\alpha$ [°] | $T\beta$ [°] | $\phi$ [°] | PI <sup>b</sup> [%] |
|----------|-----------|------------|-------------------|---------------|--------------|------------|---------------------|
| 1_LT     | 1.288(7)  | 1.267(7)   | 124.5(5)          | -0.50(8)      | -1.20(8)     | 2.34(4)    | 69.99               |
| 1_RT     | 1.300(2)  | 1.273(4)   | 122.8(1)          | 0.27(2)       | 2.08(2)      | 2.26(3)    | 69.89               |
| 2_LT     | 1.306(2)  | 1.284(2)   | 120.6(1)          | 0.10(2)       | 0.20(2)      | 1.45(1)    | 71.14               |
| 2_RT     | 1.300(2)  | 1.282(2)   | 120.9(1)          | 0.89(2)       | -0.09(2)     | 1.82(1)    | 72.40               |
| 3b_LT    | 1.281(2)  | 1.335(2)   | 120.9(1)          | -12.4(2)      | 3.1(2)       | 8.22(9)    | 71.67               |
| 3a_RT    | 1.268(3)  | 1.332(3)   | 121.7(2)          | 11.4(3)       | -2.6(3)      | 8.31(9)    | 69.13               |
| 4_LT     | 1.281(3)  | 1.336(4)   | 121.4(3)          | 40.5(4)       | 1.4(5)       | 42.5(1)    | 72.47               |
| 4_RT     | 1.281(2)  | 1.333(2)   | 121.3(2)          | -40.3(2)      | -0.6(3)      | 41.7(6)    | 73.07               |
| 5_LT     | 1.282(3)  | 1.340(3)   | 121.1(1)          | 0.00(1)       | -0.00(1)     | 0.00(1)    | 71.12               |
| 5_RT     | 1.276(3)  | 1.332(3)   | 121.5(2)          | 0.00(1)       | 0.00(1)      | 0.00(1)    | -                   |
| 6_LT     | 1.290(2)  | 1.319(1)   | 120.2(1)          | 35.3(2)       | 4.9(2)       | 42.6(8)    | 68.84               |
| 6_RT     | 1.289(2)  | 1.321(2)   | 120.3(1)          | -30.6(2)      | -5.0(2)      | 42.5(7)    | 67.38               |
| 7_LT     | 1.288(2)  | 1.330(2)   | 120.4(2)          | -4.70(3)      | 1.3(3)       | 3.15(1)    | 70.52               |
| 7_RT     | 1.286(1)  | 1.319(1)   | 120.9(1)          | 4.41(2)       | -0.95(2)     | 3.29(2)    | 70.30               |

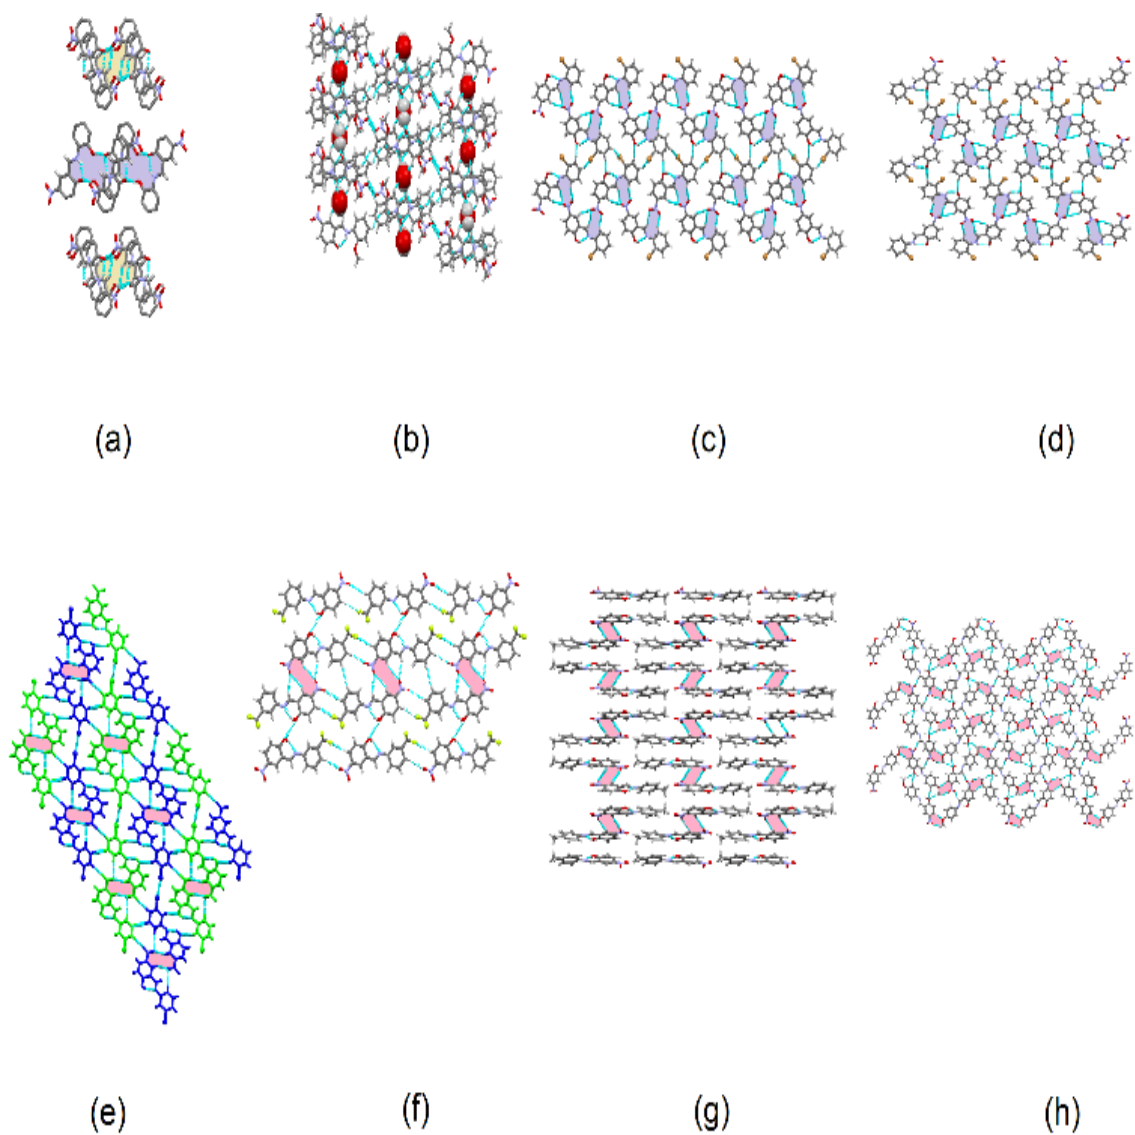

**Figure S4.** The packing patterns of (a) **1\_LT** (along the *c*-axis), (b) **2\_LT** (along the *b*-axis), (c) **3a\_RT**, (d) **3b\_LT**, (e) **4\_LT** (all viewed along the *a*-axis), (f) **5\_LT** (along the *b*-axis), (g) **6\_LT** (along the *c*-axis) and (h) **7\_LT** (viewed along the *a*-axis).

**Crystal Packing Features:** In an attempt to understand supramolecular interactions, we also discuss hydrogen bonding interactions and crystal packing features of the compounds. However, we only discussed packing features for one structure in cases where a crystal gave the same structure solution at both temperatures (LT and RT). Strong intramolecular hydrogen bonds occur between the O1 and N1 atoms, with respective O1...H1 bond lengths of 1.896(1), 1.907(6), 1.815(1), 1.833(1) and 1.916(2) Å, while their respective N1...O1 distances are 2.607(1), 2.601(6), 2.556(1), 2.559(1) and 2.608(2) Å; the values for the  $\angle$ O1...H1-N1 angles are 136.56(1), 136.80(5), 140.60(1), 140.90(1) and 136.51(2) $^\circ$ , respectively, with compound **3a\_RT** possessing the shortest bond angle. In **1\_LT**, the phenolic oxygen atom O4 in the molecule at (x, y, z) acts as a hydrogen bond donor to the phenolate oxygen atom O1 at (-x, 1-y, 2-z) while the nitro group oxygen atom O3 serves as hydrogen bond acceptor to both the phenyl ring carbon C16 and carbon atom C1 at (2-x, 1-y, 1-z). The propagation of dimers *via* intermolecular O4-H4...O1 (1.725(2) Å), C16-H16...O3 (2.564(2) Å) and, C1-H1A...O3 (2.314(2) Å) together with strong intramolecular N1-H1...O1 (1.898(1) Å) hydrogen bonds in **1\_LT** generate [Etter's symbols:  $R_2^2(18)$ ,  $R_2^2(14)$  and,  $R_2^2(10)$  and  $R_2^2(6)$ , respectively] motifs to which their combined effect form a polymeric chain running along the [1 0  $\frac{1}{2}$ ] direction (Figure S4). Moreover, packing in **1\_LT** is stabilized through weak C25-H25...O2 (at 3/2-x, -1/2+y, 3/2-z with 2.592(2) Å distance) intermolecular hydrogen bonding as well as Cg(1)...Cg(2) [Cg(1): C11-C16, Cg(2): C21-C26] stacking interactions with symmetry code (1-x, 1-y, 2-z) between the phenyl rings (centroid-centroid distance of 3.345 Å), Cg(1)... $\pi$ (arene) involving O3 at (-1+x, y, z), 2x Cg(2)... $\pi$ (arene) [facilitated by respective O2 and O3 at (1-x, 1-y, 1-z) and (3/2-x, -1/2+y, 3/2-z)],  $\pi$ (lone-pair: lp)... $\pi$ (lp) [between the phenolate O1 and O4 at (-x, 1-y, 2-z)] and  $\pi$ (arene)... $\pi$ (lp) [between C1 and O3 at (2-x, 1-y, 1-z)] separated by a stacking distances of 3.127(1), 3.189(1) and 3.418(2), 2.565(1) and 3.197(1) Å, respectively.

In the presence of crystal water, hydrogen bonded layers are formed in **2\_LT**, including molecular pairs related by a centre of symmetry with O5W-H5WA...O1 (2.020(3) Å), O6W-H6WA...O1 (2.000(5) Å) [which generate bifurcated  $R_2^2(8)$  graph set motifs] and C1-H1A...O5W (2.564(2) Å) hydrogen bonds. Furthermore, the water oxygen atom O6W acts as a hydrogen bond acceptor to the phenyl ring carbon C16 at (1-x, -y, 1-z), the nitro group oxygen atom O2 serves as hydrogen bond acceptor to another phenyl ring carbon C23 at (-1/2+x, -1/2+y, z) and their combination forms polymeric *zig-zag* chains propagating along the *ab*-plane while N1-H1...O1 at (1-x, 1-y, 1-z) forms intramolecular hydrogen bonds [generating  $S_1^1(6)$  synthon] with supramolecular distances of 2.530(2), 2.381(2) and 1.815(2) Å, respectively. The crystal water molecules propagating parallel to *b*-axis further link 2D layers into a 3D hydrogen-bonded chains running along the *ac*-plane. Besides the noticeable hydrogen bonds, there exist Cg(1)...Cg(2) [centroid-centroid distance of 4.357(9) Å] at (1-x, -y, 1-z) stacking interactions in **2\_LT**.

We also observed  $\pi$ (lp)... $\pi$ (lp) between oxygen atoms O1...O5W and O1...O6W both at (x, y, z), Cg(1)... $\pi$ (arene) at (1-x, -y, 1-z), O6W-H6WA...Cg(1) at (x, y, z), C27-H27A...O3 at (1-x, 1-y, 1-z) and D-A short H14...H24 at (-1/2+x, 1/2-y, -1/2+z) interatomic interactions set-apart by stacking/supramolecular distances of 2.887(0), 2.865(0), 3.374(2), 2.867(6), 2.653(4) and 2.287(2) Å, respectively. The propagation of the uncommon bifurcated  $R_2^2(9)$  graph set mediated *via* strong C26-H26...O3 (2.481(3) Å) and weak C1-H1A...O2 (2.715(3) Å) both at (1-x, -1/2+y, 1/2-z) intermolecular hydrogen bonds exist in **3a** while weak C16-H16...O2 (2.659(3) Å) at (1-x, -1/2+y,

1/2-z) and C23–H23···O1 (2.703(3) Å) at (2-x, -1/2+y, 3/2-z) hydrogen bonds are defined with the latter forming  $C_1^2(6)$  polymeric chains running along the *b*-axis. Furthermore, compound **3a\_RT** possess a rare  $S_1^1(5)$  graph set motif *via* strong N1–H1···Br1 (2.586(2) Å) at (x, y, z) intramolecular hydrogen bonding. It is worth to note that **3b\_LT** displays same graph motifs and intermolecular hydrogen bonds [C26–H26···O3 (2.466(2) Å), C1–H1A···O2 (2.668(2) Å) both at (1-x, -1/2+y, 1/2-z), C16–H16···O2 (2.604(2) Å) at (1-x, -1/2+y, 1/2-z) and C23–H23···O1 (2.659(2) Å) at (2-x, -1/2+y, 3/2-z)] described for compound **3a\_RT**. Moreover, like in **3a\_RT**, the **3b\_LT** tautomeric form exhibit extra C22–Br1···Cg(1) (3.946(8) Å) at (-x, -1/2+y, 1/2-z) and C24–H24···Br1 (3.017(8) Å) at (-x, -1/2+y, 1/2-z) halogen interactions including Cg(1)···Cg(2) and Cg(2)···Cg(1) [centroid–centroid distances of 3.872(9) and 3.884(9) Å, respectively] at (1-x, 1-y, 1-z) and (2-x, 1-y, 1-z),  $\pi(\text{lp})\cdots\pi(\text{lp})$  [between carbon atoms C1] at (1-x, 1-y, 1-z) and  $\pi(\text{lp})\cdots\pi(\text{lp})$  [between oxygen atoms O1 and O2] at (x, 1/2-y, -1/2+z) stacking interactions with distances of 3.355(2) and 3.019(2) Å respectively.

In the crystal of **4\_LT**, chains of molecules are formed along the *b*-axis by two-point intermolecular C16–H16···O3 (2.460(2) Å) at (1-x, 2-y, 1-z) hydrogen bonds resulting in  $R_2^2(10)$  fused motif. Likewise, the interaction of adjacent chains mediated *via* C24–H24···O2 (2.626(1) Å) at (-1/2+x, 1/2-y, 1/2+z), C26–H26···O3 (2.561(1) Å) at (1-x, 1-y, 1-z), C22–H22···O1 (2.679(5) Å) at (1/2-x, -1/2+y, 1/2-z) hydrogen bonds and Cl1···Cl1 halogen-halogen bonding (3.288(4) Å) at (1-x, 1-y, -z) results in the formation of a 3D supramolecular network.

Similarly, with the previously discussed structures, the quinoid ring system or  $S_1^1(6)$  graph symbol in **5\_LT**, is generated by strong intramolecular O1–H1···N1 (1.786(4) Å) hydrogen bonding. Moreover, centrosymmetric dimers running along the *a*-axis, which in turn construct Etter's symbol  $R_2^2(14)$ , are generated by two-point intermolecular C1–H1A···O3 (2.414(3) Å) at (1-x, y, 1-z) hydrogen bonds. The crystal of **5\_LT** is further stabilized through hydrogen bonding C24–H24···O2 (2.561(2) Å) at (x, y, -1+z) and C14–H14···F1 (2.568(2) Å) at (x, y, -1+z) intermolecular forces to form polymeric chains projected along the *b*-axis. There also exist Cg(1)···Cg(1) and Cg(1)···Cg(2) at (1/2-x, -1/2+y, 1-z) and (1/2-x, 1/2-y, 1-z) [with respective centroid–centroid distances of 3.660(1) and 3.576(1) Å] stacking interactions between the phenyl rings, F1···F2 at (x, y, 2-z) [with interatomic distances of 3.098(2) Å] type II halogen–halogen bonding,  $\pi(\text{lp})\cdots\pi(\text{lp})$  involving two O1 oxygen atoms at (-x, y, 1-z) and D–A short H25···H25 at (1-x, y, 2-z) interatomic interactions separated by intermolecular distances of 3.002(1) and 3.350(2), respectively.

In the crystal of **6\_LT**, chains of molecules are formed along the *c*-axis by two-point intermolecular C16–H16···O3 (2.538(1) Å) at (1-x, 1-y, 2-z) hydrogen bonds resulting in  $R_2^2(10)$  fused motif. Likewise, the interaction of adjacent chains mediated *via* C1–H1A···O3 (2.664(2) Å) at (1-x, 1-y, 2-z), C26–H26···O1 (2.664(1) Å) at (x, y, -1+z), C27–H27B···O3 (2.692(5) Å) at (-1+x, y, z) and C27–H27C···O2 (2.630(4) Å) at (-1+x, y, -1+z) hydrogen bonds results in the formation of 2D supramolecular architectures observed in **AYUGUX** and **AYUGUX01**.

Essentially, compound **7\_LT** displays numerous contacts which give rise to a cyclic dimer mediated by strong intermolecular C27–H27B···O2 (2.555(9) Å) at (1/2-x, 1/2+y, 1/2-z) while C14–H14···O4 (2.563(2) Å) at (3/2-x, -1/2+y, 1/2-z), C1–H1A···O3 (2.431(2) Å) at (-x, 1-y, -z), C16–H16···O3 (2.583(2) Å) at (-x, 1-y, -z), C27–H27C···O1 (2.548(9) Å) at (1-x, 1-y, 1-z) and C25–H25···O1 (2.516(2) Å) at (2-x, 1-y, 1-z) hydrogen bonds generate  $R_2^2(8)$ ,

$R_2^2$  (14),  $R_2^2$  (10),  $R_2^2$  (18) and  $R_2^2$  (24) ring motifs, like in the **MOSLUC** structure, to form a polymeric 2D supramolecular network propagating along the *a*-axis. Additionally, packing in **7\_LT** is locked *via* Cg(1)⋯Cg(1) at (1+x, y, z) and Cg(2)⋯Cg(2) at (-1+x, y, z) stacking interactions with 3.8168(13) and 3.8170(13) Å centroid–centroid distances, respectively, C27–H27A⋯π (2.851(4) Å) at (-1+x, y, z), Cg(2)⋯π(lp) (3.194(3) Å) attractive dipole–dipole interaction forces mediated by O2 at (3/2-x, -1/2+y, 1/2-z) and D–A short H26⋯H26 (2.300(3) Å) intermolecular contacts at (2-x, 1-y, 1-z).

SUPPORTING INFORMATION



### 3. Thermochromic Compounds

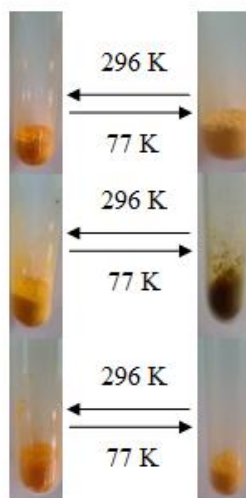

**Figure S5.** Photograph images of thermochromic compounds **3b** (top), **4** (middle) and **5** (bottom) at 77 K and 298 K.

SUPPORTING INFORMATION

#### 4. Variable Temperature Single-Crystal X-ray Diffraction Studies

**Table S3:** Structural data (collection at LT) and refinement parameters for compounds 1–7.

| Compound                                                  | 1_LT                                                          | 2_LT                                                          | 3b_LT                                                           | 4_LT                                                            | 5_LT                                                                        | 6_LT                                                          | 7_LT                                                          |
|-----------------------------------------------------------|---------------------------------------------------------------|---------------------------------------------------------------|-----------------------------------------------------------------|-----------------------------------------------------------------|-----------------------------------------------------------------------------|---------------------------------------------------------------|---------------------------------------------------------------|
| Empirical Formula                                         | C <sub>13</sub> H <sub>10</sub> N <sub>2</sub> O <sub>4</sub> | C <sub>14</sub> H <sub>14</sub> N <sub>2</sub> O <sub>6</sub> | C <sub>13</sub> H <sub>9</sub> N <sub>2</sub> O <sub>3</sub> Br | C <sub>13</sub> H <sub>9</sub> N <sub>2</sub> O <sub>3</sub> Cl | C <sub>14</sub> H <sub>9</sub> N <sub>2</sub> O <sub>3</sub> F <sub>3</sub> | C <sub>14</sub> H <sub>12</sub> N <sub>2</sub> O <sub>3</sub> | C <sub>14</sub> H <sub>12</sub> N <sub>2</sub> O <sub>4</sub> |
| M. W. (g.mol <sup>-1</sup> )                              | 258.24                                                        | 306.29                                                        | 321.13                                                          | 275.66                                                          | 310.23                                                                      | 256.26                                                        | 272.26                                                        |
| T (K)                                                     | 150                                                           | 150                                                           | 150                                                             | 150                                                             | 150                                                                         | 150                                                           | 150                                                           |
| λ (Å)                                                     | 1.54178                                                       | 0.71073                                                       | 0.71073                                                         | 1.54178                                                         | 0.71073                                                                     | 0.71073                                                       | 0.71073                                                       |
| Crystal habit, colour                                     | plate, orange                                                 | prism, red-orange                                             | block, orange                                                   | needle, yellow                                                  | rod, orange                                                                 | needle, orange                                                | needle, yellow                                                |
| Crystal size (mm <sup>3</sup> )                           | 0.781 x 0.279 x 0.116                                         | 0.345 x 0.181 x 0.167                                         | 0.533 x 0.264 x 0.222                                           | 0.256 x 0.137 x 0.073                                           | 0.331 x 0.304 x 0.283                                                       | 0.260 x 0.219 x 0.084                                         | 0.221 x 0.092 x 0.033                                         |
| Lattice                                                   | Monoclinic                                                    | Monoclinic                                                    | Monoclinic                                                      | Monoclinic                                                      | Monoclinic                                                                  | Monoclinic                                                    | Monoclinic                                                    |
| Space group                                               | <i>P</i> 2 <sub>1</sub> / <i>n</i>                            | <i>C</i> 2/ <i>c</i>                                          | <i>P</i> 2 <sub>1</sub> / <i>c</i>                              | <i>P</i> 2 <sub>1</sub> / <i>n</i>                              | <i>C</i> 2/ <i>m</i>                                                        | <i>P</i> 2 <sub>1</sub> / <i>c</i>                            | <i>P</i> 2 <sub>1</sub> / <i>n</i>                            |
| <i>a</i> (Å)                                              | 6.2847(10)                                                    | 26.0543(14)                                                   | 7.4282(9)                                                       | 14.6564(3)                                                      | 14.331(3)                                                                   | 14.0746(8)                                                    | 3.8169(5)                                                     |
| <i>b</i> (Å)                                              | 23.555(3)                                                     | 6.9252(4)                                                     | 11.5053(14)                                                     | 3.7374(1)                                                       | 6.5948(14)                                                                  | 13.9715(7)                                                    | 21.416(3)                                                     |
| <i>c</i> (Å)                                              | 7.7504(12)                                                    | 15.7729(9)                                                    | 14.0071(16)                                                     | 21.4431(4)                                                      | 14.147(3)                                                                   | 6.1944(4)                                                     | 15.220(3)                                                     |
| β (°)                                                     | 94.788(9)                                                     | 111.788(2)                                                    | 93.651(6)                                                       | 92.109(2)                                                       | 107.308(6)                                                                  | 95.289(2)                                                     | 96.042(5)                                                     |
| Vol (Å <sup>3</sup> )                                     | 1143.3(3)                                                     | 2642.6(3)                                                     | 1194.7(2)                                                       | 1173.8(5)                                                       | 1276.5(4)                                                                   | 1212.90(12)                                                   | 1237.2(3)                                                     |
| Z                                                         | 4                                                             | 8                                                             | 4                                                               | 4                                                               | 4                                                                           | 4                                                             | 4                                                             |
| D <sub>calcd</sub> (g.cm <sup>-3</sup> )                  | 1.500                                                         | 1.459                                                         | 1.785                                                           | 1.560                                                           | 1.641                                                                       | 1.403                                                         | 1.4615                                                        |
| F(000)                                                    | 536.0                                                         | 1216                                                          | 639.2                                                           | 564.0                                                           | 632.5                                                                       | 536                                                           | 568.3                                                         |
| μ (mm <sup>-1</sup> )                                     | 0.958                                                         | 0.112                                                         | 3.446                                                           | 2.955                                                           | 0.143                                                                       | 0.100                                                         | 0.109                                                         |
| No. reflns                                                | 36114                                                         | 34814                                                         | 37547                                                           | 11919                                                           | 46865                                                                       | 5853                                                          | 84574                                                         |
| Data / restr. / par.                                      | 2226 / 0 / 172                                                | 1870 / 0 / 202                                                | 2964 / 0 / 175                                                  | 2249 / 0 / 176                                                  | 1412 / 0 / 132                                                              | 1474 / 0 / 179                                                | 2490 / 0 / 186                                                |
| R(int) / R(sigma)                                         | 0.2513 / 0.0988                                               | 0.1147 / 0.0328                                               | 0.0314 / 0.0133                                                 | 0.0556 / 0.0308                                                 | 0.0423 / 0.0098                                                             | 0.0655 / 0.0533                                               | 0.0622 / 0.0143                                               |
| R <sub>1</sub> / wR <sub>2</sub> (I > 2σ(I)) <sup>a</sup> | 0.0974 / 0.2320                                               | 0.0607 / 0.1506                                               | 0.0203 / 0.0491                                                 | 0.0437 / 0.1234                                                 | 0.0335 / 0.0870                                                             | 0.0622 / 0.1566                                               | 0.0407 / 0.0996                                               |
| R <sub>1</sub> / wR <sub>2</sub> [all data]               | 0.1983 / 0.2890                                               | 0.1179 / 0.2317                                               | 0.0242 / 0.0518                                                 | 0.0468 / 0.1264                                                 | 0.0438 / 0.1062                                                             | 0.1151 / 0.2187                                               | 0.0616 / 0.1330                                               |
| GOOF                                                      | 1.029                                                         | 1.022                                                         | 1.060                                                           | 1.088                                                           | 1.167                                                                       | 1.020                                                         | 1.206                                                         |
| CCDC no.                                                  | 1989398                                                       | 2191115                                                       | 2014911                                                         | 2191118                                                         | 2062423                                                                     | 2191117                                                       | 1989403                                                       |

**Table S3:** Structural data (collection at RT) and refinement parameters for compounds 1–7.

| Compound                                                  | 1_RT                                                          | 2_RT                                                          | 3a_RT                                                           | 4_RT                                                            | 5_RT                                                                        | 6_RT                                                          | 7_RT                                                          |
|-----------------------------------------------------------|---------------------------------------------------------------|---------------------------------------------------------------|-----------------------------------------------------------------|-----------------------------------------------------------------|-----------------------------------------------------------------------------|---------------------------------------------------------------|---------------------------------------------------------------|
| Empirical Formula                                         | C <sub>13</sub> H <sub>10</sub> N <sub>2</sub> O <sub>4</sub> | C <sub>14</sub> H <sub>14</sub> N <sub>2</sub> O <sub>6</sub> | C <sub>13</sub> H <sub>9</sub> N <sub>2</sub> O <sub>3</sub> Br | C <sub>13</sub> H <sub>9</sub> N <sub>2</sub> O <sub>3</sub> Cl | C <sub>14</sub> H <sub>9</sub> N <sub>2</sub> O <sub>3</sub> F <sub>3</sub> | C <sub>14</sub> H <sub>12</sub> N <sub>2</sub> O <sub>3</sub> | C <sub>14</sub> H <sub>12</sub> N <sub>2</sub> O <sub>4</sub> |
| M. W. (g.mol <sup>-1</sup> )                              | 258.24                                                        | 306.29                                                        | 321.13                                                          | 275.66                                                          | 310.23                                                                      | 256.26                                                        | 272.26                                                        |
| T (K)                                                     | 298                                                           | 298                                                           | 298                                                             | 298                                                             | 298                                                                         | 298                                                           | 298                                                           |
| λ (Å)                                                     | 0.71073                                                       | 0.71073                                                       | 0.71073                                                         | 1.54178                                                         | 1.54178                                                                     | 0.71073                                                       | 1.54178                                                       |
| Crystal habit, colour                                     | plate, orange                                                 | prism, red-orange                                             | block, orange                                                   | needle, yellow                                                  | rod, orange                                                                 | needle, orange                                                | needle, yellow                                                |
| Crystal size (mm <sup>3</sup> )                           | 0.781 x 0.279 x 0.116                                         | 0.345 x 0.181 x 0.167                                         | 0.533 x 0.264 x 0.222                                           | 0.256 x 0.137 x 0.073                                           | 0.331 x 0.304 x 0.283                                                       | 0.260 x 0.219 x 0.084                                         | 0.221 x 0.092 x 0.033                                         |
| Lattice                                                   | Monoclinic                                                    | Monoclinic                                                    | Monoclinic                                                      | Monoclinic                                                      | Monoclinic                                                                  | Monoclinic                                                    | Monoclinic                                                    |
| Space group                                               | <i>P2<sub>1</sub>/n</i>                                       | <i>C2/c</i>                                                   | <i>P2<sub>1</sub>/c</i>                                         | <i>P2<sub>1</sub>/n</i>                                         | <i>C2/m</i>                                                                 | <i>P2<sub>1</sub>/c</i>                                       | <i>P2<sub>1</sub>/n</i>                                       |
| <i>a</i> (Å)                                              | 6.3334(9)                                                     | 26.1210(3)                                                    | 7.5948(12)                                                      | 14.7430(5)                                                      | 14.3061(3)                                                                  | 14.0950(6)                                                    | 3.8838(10)                                                    |
| <i>b</i> (Å)                                              | 23.683(3)                                                     | 7.0281(7)                                                     | 11.5863(18)                                                     | 3.7894(10)                                                      | 6.7681(2)                                                                   | 14.2250(6)                                                    | 21.6182(5)                                                    |
| <i>c</i> (Å)                                              | 7.8211(10)                                                    | 15.8739(17)                                                   | 14.0550(2)                                                      | 21.5528(7)                                                      | 14.2305(3)                                                                  | 6.2470(3)                                                     | 15.2697(3)                                                    |
| β (°)                                                     | 93.769(5)                                                     | 111.639(4)                                                    | 94.165(7)                                                       | 91.845(3)                                                       | 106.830(2)                                                                  | 95.355(17)                                                    | 96.652(2)                                                     |
| Vol (Å <sup>3</sup> )                                     | 1170.6(3)                                                     | 2708.8(5)                                                     | 1233.5(3)                                                       | 1203.47(6)                                                      | 1318.85(6)                                                                  | 1247.2(9)                                                     | 1273.43(5)                                                    |
| Z                                                         | 4                                                             | 8                                                             | 4                                                               | 4                                                               | 4                                                                           | 4                                                             | 4                                                             |
| D <sub>calcd</sub> (g.cm <sup>-3</sup> )                  | 1.465                                                         | 1.424                                                         | 1.729                                                           | 1.521                                                           | 1.557                                                                       | 1.375                                                         | 1.420                                                         |
| F(000)                                                    | 536.0                                                         | 1216                                                          | 640.0                                                           | 564.0                                                           | 628.0                                                                       | 536                                                           | 570.1                                                         |
| μ (mm <sup>-1</sup> )                                     | 0.111                                                         | 0.110                                                         | 3.446                                                           | 2.882                                                           | 1.218                                                                       | 0.098                                                         | 0.888                                                         |
| No. reflns                                                | 23657                                                         | 14279                                                         | 32288                                                           | 6431                                                            | 8627                                                                        | 34150                                                         | 17323                                                         |
| Data / restr. / par.                                      | 1186 / 0 / 182                                                | 1506 / 0 / 198                                                | 3075 / 0 / 173                                                  | 2461 / 0 / 173                                                  | 1262 / 44 / 140                                                             | 1534 / 0 / 179                                                | 2284 / 0 / 185                                                |
| R(int) / R(sigma)                                         | 0.1021 / 0.0281                                               | 0.1243 / 0.0468                                               | 0.0395 / 0.0235                                                 | 0.0234 / 0.0292                                                 | 0.0199 / 0.0106                                                             | 0.0944 / 0.0223                                               | 0.0337 / 0.0149                                               |
| R <sub>1</sub> / wR <sub>2</sub> (I > 2σ(I)) <sup>a</sup> | 0.0885 / 0.2445                                               | 0.0572 / 0.1502                                               | 0.0325 / 0.0746                                                 | 0.0395 / 0.1063                                                 | 0.0510 / 0.1437                                                             | 0.0658 / 0.1542                                               | 0.0364 / 0.1045                                               |
| R <sub>1</sub> / wR <sub>2</sub> [all data]               | 0.1486 / 0.3586                                               | 0.1247 / 0.2331                                               | 0.0543 / 0.0856                                                 | 0.0503 / 0.1159                                                 | 0.0561 / 0.1470                                                             | 0.1238 / 0.2363                                               | 0.0386 / 0.1072                                               |
| GOOF                                                      | 1.198                                                         | 1.058                                                         | 1.037                                                           | 1.047                                                           | 1.139                                                                       | 0.860                                                         | 1.106                                                         |
| CCDC no.                                                  | 2191114                                                       | 2191116                                                       | 1966932                                                         | 2156467                                                         | 1989369                                                                     | 2191119                                                       | 2049690                                                       |

**Table S4:** Crystallographic details of compound **3b** from 150–300 K

| Compound                                                  | 3b_150K                                                         | 3b_180K                                                         | 3b_210K                                                         | 3b_240K                                                         | 3b_270K                                                         | 3b_300K                                                         |
|-----------------------------------------------------------|-----------------------------------------------------------------|-----------------------------------------------------------------|-----------------------------------------------------------------|-----------------------------------------------------------------|-----------------------------------------------------------------|-----------------------------------------------------------------|
| Empirical Formula                                         | C <sub>13</sub> H <sub>9</sub> N <sub>2</sub> O <sub>3</sub> Br | C <sub>13</sub> H <sub>9</sub> N <sub>2</sub> O <sub>3</sub> Br | C <sub>13</sub> H <sub>9</sub> N <sub>2</sub> O <sub>3</sub> Br | C <sub>13</sub> H <sub>9</sub> N <sub>2</sub> O <sub>3</sub> Br | C <sub>13</sub> H <sub>9</sub> N <sub>2</sub> O <sub>3</sub> Br | C <sub>13</sub> H <sub>9</sub> N <sub>2</sub> O <sub>3</sub> Br |
| M. W. (g.mol <sup>-1</sup> )                              | 321.12                                                          | 321.12                                                          | 321.12                                                          | 321.12                                                          | 321.12                                                          | 321.12                                                          |
| T (K)                                                     | 150                                                             | 180                                                             | 210                                                             | 240                                                             | 270                                                             | 300                                                             |
| λ (Å)                                                     | 1.54178                                                         | 1.54178                                                         | 1.54178                                                         | 1.54178                                                         | 1.54178                                                         | 1.54178                                                         |
| Crystal habit, colour                                     | block, orange-brown                                             |
| Crystal size (mm <sup>3</sup> )                           | 0.716 x 0.237 x 0.186                                           |
| Lattice                                                   | Monoclinic                                                      | Monoclinic                                                      | Monoclinic                                                      | Monoclinic                                                      | Monoclinic                                                      | Monoclinic                                                      |
| Space group                                               | <i>P</i> 2 <sub>1</sub> / <i>c</i>                              |
| <i>a</i> (Å)                                              | 7.4403(10)                                                      | 7.4688(10)                                                      | 7.4982(10)                                                      | 7.5309(10)                                                      | 7.5635(2)                                                       | 7.5995(10)                                                      |
| <i>b</i> (Å)                                              | 11.5220(2)                                                      | 11.5368(2)                                                      | 11.5476(2)                                                      | 11.5580(2)                                                      | 11.5743(3)                                                      | 11.5868(2)                                                      |
| <i>c</i> (Å)                                              | 14.0179(2)                                                      | 14.0272(2)                                                      | 14.0374(2)                                                      | 14.0459(2)                                                      | 14.0536(3)                                                      | 14.0731(2)                                                      |
| β (°)                                                     | 93.6690(10)                                                     | 93.764(10)                                                      | 93.869(10)                                                      | 94.004(10)                                                      | 94.109(2)                                                       | 94.2470(10)                                                     |
| Vol (Å <sup>3</sup> )                                     | 1199.25(3)                                                      | 1206.06(3)                                                      | 1212.68(3)                                                      | 1219.60(3)                                                      | 1227.12(5)                                                      | 1235.79(3)                                                      |
| Z                                                         | 4                                                               | 4                                                               | 4                                                               | 4                                                               | 4                                                               | 4                                                               |
| D <sub>calcd</sub> (g.cm <sup>-3</sup> )                  | 1.773                                                           | 1.763                                                           | 1.753                                                           | 1.743                                                           | 1.733                                                           | 1.721                                                           |
| F(000)                                                    | 599.0                                                           | 636.0                                                           | 636.0                                                           | 636.0                                                           | 636.0                                                           | 636.0                                                           |
| μ (mm <sup>-1</sup> )                                     | 4.747                                                           | 4.720                                                           | 4.694                                                           | 4.668                                                           | 4.639                                                           | 4.607                                                           |
| No. reflns                                                | 14931                                                           | 14426                                                           | 15147                                                           | 14419                                                           | 8199                                                            | 15577                                                           |
| Data / restr. / par.                                      | 2522 / 0 / 173                                                  | 2529 / 0 / 173                                                  | 2542 / 0 / 172                                                  | 2564 / 0 / 173                                                  | 2530 / 0 / 173                                                  | 2596 / 0 / 173                                                  |
| R(int) / R(sigma)                                         | 0.0318 / 0.0156                                                 | 0.0579 / 0.0263                                                 | 0.0341 / 0.0162                                                 | 0.0690 / 0.0286                                                 | 0.0268 / 0.0223                                                 | 0.0552 / 0.0256                                                 |
| R <sub>1</sub> / wR <sub>2</sub> (I > 2σ(I)) <sup>a</sup> | 0.0256 / 0.0677                                                 | 0.0369 / 0.1023                                                 | 0.0314 / 0.0870                                                 | 0.0378 / 0.1017                                                 | 0.0349 / 0.0936                                                 | 0.0367 / 0.1027                                                 |
| R <sub>1</sub> / wR <sub>2</sub> [all data]               | 0.0265 / 0.0683                                                 | 0.0384 / 0.1034                                                 | 0.0329 / 0.0881                                                 | 0.0403 / 0.1033                                                 | 0.0385 / 0.0964                                                 | 0.0388 / 0.1046                                                 |
| GOOF                                                      | 1.037                                                           | 1.085                                                           | 1.091                                                           | 1.048                                                           | 1.055                                                           | 1.077                                                           |
| CCDC No.                                                  | 2156456                                                         | 2156457                                                         | 2156458                                                         | 2156459                                                         | 2156460                                                         | 2156461                                                         |

**Table S5:** Crystallographic details of compound **4** from 150–300 K

| Compound                                                  | 4_150K                                                          | 4_180K                                                          | 4_210K                                                          | 4_240K                                                          | 4_270K                                                          | 4_300K                                                          |
|-----------------------------------------------------------|-----------------------------------------------------------------|-----------------------------------------------------------------|-----------------------------------------------------------------|-----------------------------------------------------------------|-----------------------------------------------------------------|-----------------------------------------------------------------|
| Empirical Formula                                         | C <sub>13</sub> H <sub>9</sub> N <sub>2</sub> O <sub>3</sub> Cl | C <sub>13</sub> H <sub>9</sub> N <sub>2</sub> O <sub>3</sub> Cl | C <sub>13</sub> H <sub>9</sub> N <sub>2</sub> O <sub>3</sub> Cl | C <sub>13</sub> H <sub>9</sub> N <sub>2</sub> O <sub>3</sub> Cl | C <sub>13</sub> H <sub>9</sub> N <sub>2</sub> O <sub>3</sub> Cl | C <sub>13</sub> H <sub>9</sub> N <sub>2</sub> O <sub>3</sub> Cl |
| M. W. (g.mol <sup>-1</sup> )                              | 275.66                                                          | 275.66                                                          | 275.66                                                          | 275.66                                                          | 275.66                                                          | 275.66                                                          |
| T (K)                                                     | 150                                                             | 180                                                             | 210                                                             | 240                                                             | 270                                                             | 300                                                             |
| λ (Å)                                                     | 1.54178                                                         | 1.54178                                                         | 1.54178                                                         | 1.54178                                                         | 1.54178                                                         | 1.54178                                                         |
| Crystal habit, colour                                     | needle, yellow                                                  |
| Crystal size (mm <sup>3</sup> )                           | 0.256 x 0.137 x 0.073                                           |
| Lattice                                                   | Monoclinic                                                      | Monoclinic                                                      | Monoclinic                                                      | Monoclinic                                                      | Monoclinic                                                      | Monoclinic                                                      |
| Space group                                               | <i>P</i> 2 <sub>1</sub> / <i>n</i>                              |
| <i>a</i> (Å)                                              | 14.6564(3)                                                      | 14.6708(2)                                                      | 14.6907(2)                                                      | 14.7034(3)                                                      | 14.7251(3)                                                      | 14.7430(5)                                                      |
| <i>b</i> (Å)                                              | 3.7374(1)                                                       | 3.7471(10)                                                      | 3.7572(5)                                                       | 3.7661(10)                                                      | 3.7787(10)                                                      | 3.7894(10)                                                      |
| <i>c</i> (Å)                                              | 21.4431(4)                                                      | 21.4612(3)                                                      | 21.4853(3)                                                      | 21.5036(4)                                                      | 21.5304(3)                                                      | 21.5528(7)                                                      |
| β (°)                                                     | 92.109(2)                                                       | 92.028(2)                                                       | 91.9844(13)                                                     | 91.9240(2)                                                      | 91.869(2)                                                       | 91.845(3)                                                       |
| Vol (Å <sup>3</sup> )                                     | 1173.80(5)                                                      | 1179.05(4)                                                      | 1185.20(3)                                                      | 1190.08(5)                                                      | 1197.35(4)                                                      | 1203.47(6)                                                      |
| Z                                                         | 4                                                               | 4                                                               | 4                                                               | 4                                                               | 4                                                               | 4                                                               |
| D <sub>calcd</sub> (g.cm <sup>-3</sup> )                  | 1.560                                                           | 1.553                                                           | 1.545                                                           | 1.539                                                           | 1.539                                                           | 1.521                                                           |
| F(000)                                                    | 564.0                                                           | 564.0                                                           | 564.0                                                           | 564.0                                                           | 564.0                                                           | 564.0                                                           |
| μ (mm <sup>-1</sup> )                                     | 2.955                                                           | 2.942                                                           | 2.927                                                           | 2.915                                                           | 2.897                                                           | 2.882                                                           |
| No. reflns                                                | 11919                                                           | 12250                                                           | 12380                                                           | 12317                                                           | 12528                                                           | 6431                                                            |
| Data / restr. / par.                                      | 2249 / 0 / 176                                                  | 2475 / 0 / 173                                                  | 2484 / 0 / 173                                                  | 2507 / 0 / 173                                                  | 2503 / 0 / 172                                                  | 2461 / 0 / 173                                                  |
| R(int) / R(sigma)                                         | 0.0556 / 0.0308                                                 | 0.0390 / 0.0252                                                 | 0.0321 / 0.0221                                                 | 0.0364 / 0.0228                                                 | 0.0345 / 0.0240                                                 | 0.0234 / 0.0292                                                 |
| R <sub>1</sub> / wR <sub>2</sub> (I > 2σ(I)) <sup>a</sup> | 0.0437 / 0.1234                                                 | 0.0366 / 0.1006                                                 | 0.0352 / 0.0929                                                 | 0.0362 / 0.1003                                                 | 0.0407 / 0.1217                                                 | 0.0395 / 0.1063                                                 |
| R <sub>1</sub> / wR <sub>2</sub> [all data]               | 0.0468 / 0.1264                                                 | 0.0396 / 0.1030                                                 | 0.0389 / 0.0956                                                 | 0.0416 / 0.1045                                                 | 0.0461 / 0.1263                                                 | 0.0503 / 0.1159                                                 |
| GOOF                                                      | 1.088                                                           | 1.078                                                           | 1.074                                                           | 1.080                                                           | 1.062                                                           | 1.047                                                           |
| CCDC No.                                                  | 2156462                                                         | 2156463                                                         | 2156464                                                         | 2156465                                                         | 2156466                                                         | 2156467                                                         |

**Table S6:** Crystallographic details of compound **5** from 150–300 K

| Compound                                                  | 5_150K                                                                      | 5_180K                                                                      | 5_210K                                                                      | 5_240K                                                                      | 5_270K                                                                      | 5_300K                                                                      |
|-----------------------------------------------------------|-----------------------------------------------------------------------------|-----------------------------------------------------------------------------|-----------------------------------------------------------------------------|-----------------------------------------------------------------------------|-----------------------------------------------------------------------------|-----------------------------------------------------------------------------|
| Empirical Formula                                         | C <sub>14</sub> H <sub>9</sub> F <sub>3</sub> N <sub>2</sub> O <sub>3</sub> | C <sub>14</sub> H <sub>9</sub> F <sub>3</sub> N <sub>2</sub> O <sub>3</sub> | C <sub>14</sub> H <sub>9</sub> F <sub>3</sub> N <sub>2</sub> O <sub>3</sub> | C <sub>14</sub> H <sub>9</sub> F <sub>3</sub> N <sub>2</sub> O <sub>3</sub> | C <sub>14</sub> H <sub>9</sub> F <sub>3</sub> N <sub>2</sub> O <sub>3</sub> | C <sub>14</sub> H <sub>9</sub> F <sub>3</sub> N <sub>2</sub> O <sub>3</sub> |
| M. W. (g.mol <sup>-1</sup> )                              | 309.22                                                                      | 309.22                                                                      | 309.22                                                                      | 309.22                                                                      | 309.22                                                                      | 309.22                                                                      |
| T (K)                                                     | 150                                                                         | 180                                                                         | 210                                                                         | 240                                                                         | 270                                                                         | 300                                                                         |
| λ (Å)                                                     | 1.54178                                                                     | 1.54178                                                                     | 1.54178                                                                     | 1.54178                                                                     | 1.54178                                                                     | 1.54178                                                                     |
| Crystal habit, colour                                     | plate, orange                                                               |
| Crystal size (mm <sup>3</sup> )                           | 0.343 x 0.284 x 0.212                                                       |
| Lattice                                                   | Monoclinic                                                                  | Monoclinic                                                                  | Monoclinic                                                                  | Monoclinic                                                                  | Monoclinic                                                                  | Monoclinic                                                                  |
| Space group                                               | <i>C2/m</i>                                                                 | <i>C2/m</i>                                                                 | <i>C2/m</i>                                                                 | <i>C2/m</i>                                                                 | <i>C2/m</i>                                                                 | <i>C2/m</i>                                                                 |
| <i>a</i> (Å)                                              | 14.3165(4)                                                                  | 14.3145(4)                                                                  | 14.3133(3)                                                                  | 14.3118(4)                                                                  | 14.3128(6)                                                                  | 14.3168(6)                                                                  |
| <i>b</i> (Å)                                              | 6.59390(2)                                                                  | 6.62200(2)                                                                  | 6.6574(10)                                                                  | 6.69250(2)                                                                  | 6.73270(2)                                                                  | 6.77160(3)                                                                  |
| <i>c</i> (Å)                                              | 14.1523(3)                                                                  | 14.1681(4)                                                                  | 14.1840(3)                                                                  | 14.1987(3)                                                                  | 14.2071(5)                                                                  | 14.2320(5)                                                                  |
| β (°)                                                     | 107.224(3)                                                                  | 107.166(3)                                                                  | 107.075(2)                                                                  | 106.993(3)                                                                  | 107.952(4)                                                                  | 106.790(4)                                                                  |
| Vol (Å <sup>3</sup> )                                     | 1276.09(7)                                                                  | 1283.18(7)                                                                  | 1292.01(5)                                                                  | 1300.60(6)                                                                  | 1309.56(9)                                                                  | 1320.94(10)                                                                 |
| Z                                                         | 4                                                                           | 4                                                                           | 4                                                                           | 4                                                                           | 4                                                                           | 4                                                                           |
| D <sub>calcd</sub> (g.cm <sup>-3</sup> )                  | 1.610                                                                       | 1.601                                                                       | 1.590                                                                       | 1.579                                                                       | 1.568                                                                       | 1.555                                                                       |
| F(000)                                                    | 628.0                                                                       | 628.0                                                                       | 628.0                                                                       | 628.0                                                                       | 628.0                                                                       | 628.0                                                                       |
| μ (mm <sup>-1</sup> )                                     | 1.259                                                                       | 1.252                                                                       | 1.243                                                                       | 1.235                                                                       | 1.227                                                                       | 1.216                                                                       |
| No. reflns                                                | 6528                                                                        | 6866                                                                        | 6927                                                                        | 6938                                                                        | 6685                                                                        | 6419                                                                        |
| Data / restr. / par.                                      | 1442 / 0 / 133                                                              | 1447 / 0 / 133                                                              | 1461 / 0 / 133                                                              | 1483 / 0 / 133                                                              | 1476 / 0 / 133                                                              | 1460 / 0 / 133                                                              |
| R(int) / R(sigma)                                         | 0.0304 / 0.0166                                                             | 0.0267 / 0.0150                                                             | 0.0243 / 0.0137                                                             | 0.0280 / 0.0153                                                             | 0.0325 / 0.0176                                                             | 0.0623 / 0.0304                                                             |
| R <sub>1</sub> / wR <sub>2</sub> (I > 2σ(I)) <sup>a</sup> | 0.0403 / 0.1185                                                             | 0.0403 / 0.1224                                                             | 0.0428 / 0.1372                                                             | 0.0560 / 0.1475                                                             | 0.0640 / 0.1574                                                             | 0.0655 / 0.2135                                                             |
| R <sub>1</sub> / wR <sub>2</sub> [all data]               | 0.0460 / 0.1205                                                             | 0.0438 / 0.1241                                                             | 0.0479 / 0.1397                                                             | 0.0616 / 0.1495                                                             | 0.0763 / 0.1616                                                             | 0.0728 / 0.2377                                                             |
| GOOF                                                      | 1.208                                                                       | 1.162                                                                       | 1.204                                                                       | 1.214                                                                       | 1.261                                                                       | 1.183                                                                       |
| CCDC No.                                                  | 2191108                                                                     | 2191109                                                                     | 2191110                                                                     | 2191111                                                                     | 2191112                                                                     | 2191113                                                                     |

**Table S7:** Crystallographic details of compounds **1**, **2**, **5** and **6** at different temperatures in Kelvin.

| Compound                                                  | 1_200K                                                        | 2_100K                                                        | 2_200K                                                        | 5_140K                                                                      | 6_200K                                                        | 6_230K                                                        |
|-----------------------------------------------------------|---------------------------------------------------------------|---------------------------------------------------------------|---------------------------------------------------------------|-----------------------------------------------------------------------------|---------------------------------------------------------------|---------------------------------------------------------------|
| Empirical Formula                                         | C <sub>13</sub> H <sub>10</sub> N <sub>2</sub> O <sub>4</sub> | C <sub>14</sub> H <sub>14</sub> N <sub>2</sub> O <sub>6</sub> | C <sub>14</sub> H <sub>14</sub> N <sub>2</sub> O <sub>6</sub> | C <sub>14</sub> H <sub>9</sub> F <sub>3</sub> N <sub>2</sub> O <sub>3</sub> | C <sub>14</sub> H <sub>12</sub> N <sub>2</sub> O <sub>3</sub> | C <sub>14</sub> H <sub>12</sub> N <sub>2</sub> O <sub>3</sub> |
| M. W. (g.mol <sup>-1</sup> )                              | 258.24                                                        | 306.29                                                        | 306.29                                                        | 309.22                                                                      | 256.26                                                        | 256.26                                                        |
| T (K)                                                     | 200                                                           | 100                                                           | 200                                                           | 140                                                                         | 200                                                           | 230                                                           |
| λ (Å)                                                     | 0.71073                                                       | 0.71073                                                       | 0.71073                                                       | 1.54178                                                                     | 0.71073                                                       | 0.71073                                                       |
| Crystal habit, colour                                     | plate, orange                                                 | plate, yellow                                                 | plate, brown                                                  | plate, orange                                                               | block, orange                                                 | block, orange                                                 |
| Crystal size (mm <sup>3</sup> )                           | 0.781 x 0.279 x 0.116                                         | 0.272 x 0.076 x 0.031                                         | 0.672 x 0.623 x 0.030                                         | 0.331 x 0.304 x 0.283                                                       | 0.492 x 0.491 x 0.164                                         | 0.772 x 0.668 x 0.120                                         |
| Lattice                                                   | Monoclinic                                                    | Monoclinic                                                    | Monoclinic                                                    | Monoclinic                                                                  | Monoclinic                                                    | Monoclinic                                                    |
| Space group                                               | <i>P2<sub>1</sub>/n</i>                                       | <i>C2/c</i>                                                   | <i>C2/c</i>                                                   | <i>C2/m</i>                                                                 | <i>P2<sub>1</sub>/c</i>                                       | <i>P2<sub>1</sub>/c</i>                                       |
| <i>a</i> (Å)                                              | 6.2976(4)                                                     | 26.0205(13)                                                   | 26.0764(13)                                                   | 14.3244(3)                                                                  | 14.0746(5)                                                    | 14.0772(11)                                                   |
| <i>b</i> (Å)                                              | 23.6484(13)                                                   | 6.8984(4)                                                     | 6.9741(4)                                                     | 6.5885(10)                                                                  | 14.0175(6)                                                    | 14.1814(12)                                                   |
| <i>c</i> (Å)                                              | 7.7663(4)                                                     | 15.7463(8)                                                    | 15.7872(7)                                                    | 14.1537(3)                                                                  | 6.1991(3)                                                     | 6.2335(5)                                                     |
| β (°)                                                     | 94.638(2)                                                     | 111.802(2)                                                    | 111.460(2)                                                    | 107.249(2)                                                                  | 95.245(2)                                                     | 95.379(4)                                                     |
| Vol (Å <sup>3</sup> )                                     | 1152.83(11)                                                   | 2624.3(2)                                                     | 2672.0(2)                                                     | 1275.70(4)                                                                  | 1217.9(9)                                                     | 1238.94(17)                                                   |
| Z                                                         | 4                                                             | 8                                                             | 8                                                             | 4                                                                           | 4                                                             | 4                                                             |
| D <sub>calcd</sub> (g.cm <sup>-3</sup> )                  | 1.488                                                         | 1.467                                                         | 1.433                                                         | 1.610                                                                       | 1.3975                                                        | 1.374                                                         |
| F(000)                                                    | 536.0                                                         | 1213.5                                                        | 1216.7                                                        | 628.0                                                                       | 536.3                                                         | 536.3                                                         |
| μ (mm <sup>-1</sup> )                                     | 0.113                                                         | 0.113                                                         | 0.111                                                         | 1.259                                                                       | 0.100                                                         | 0.099                                                         |
| No. reflns                                                | 21349                                                         | 17663                                                         | 22631                                                         | 6765                                                                        | 22992                                                         | 31233                                                         |
| Data / restr. / par.                                      | 2819 / 0 / 175                                                | 3208 / 0 / 199                                                | 2375 / 0 / 197                                                | 1456 / 0 / 133                                                              | 3013 / 0 / 181                                                | 3037 / 0 / 176                                                |
| R(int) / R(sigma)                                         | 0.0256 / 0.0181                                               | 0.0734 / 0.0505                                               | 0.0301 / 0.0227                                               | 0.0297 / 0.0173                                                             | 0.0239 / 0.0165                                               | 0.0455 / 0.0247                                               |
| R <sub>1</sub> / wR <sub>2</sub> (I > 2σ(I)) <sup>a</sup> | 0.0426 / 0.0997                                               | 0.0418 / 0.0994                                               | 0.0410 / 0.1010                                               | 0.0403 / 0.1173                                                             | 0.0426 / 0.1281                                               | 0.0494 / 0.1325                                               |
| R <sub>1</sub> / wR <sub>2</sub> [all data]               | 0.0503 / 0.1083                                               | 0.0628 / 0.1194                                               | 0.0650 / 0.1149                                               | 0.0447 / 0.1195                                                             | 0.0524 / 0.1260                                               | 0.0666 / 0.1598                                               |
| GOOF                                                      | 1.061                                                         | 1.092                                                         | 1.028                                                         | 1.112                                                                       | 1.070                                                         | 1.141                                                         |
| CCDC No.                                                  | 1899401                                                       | 2014914                                                       | 2049691                                                       | 2191107                                                                     | 1902658                                                       | 2019418                                                       |

## 5. Calculation of Thermal Expansion Coefficient by *PASCal*<sup>3</sup> Program

**Table S8:** Thermal Expansion Coefficient of compounds **3b**, **4** and **5** within the temperature range of 150 K to 300 K

| Compound 3b |                          |                                | Direction |         |        |
|-------------|--------------------------|--------------------------------|-----------|---------|--------|
| Axes        | $\alpha(\text{MK}^{-1})$ | $\sigma\alpha(\text{MK}^{-1})$ | a         | b       | c      |
| X1          | 12.9993                  | 1.4643                         | 0.5000    | 0.0000  | 1.0000 |
| X2          | 34.6335                  | 2.3045                         | 0.0000    | 1.0000  | 0.0000 |
| X3          | 149.3944                 | 3.1099                         | 1.0000    | 0.0000  | 0.0000 |
| V           | 199.2712                 | 6.4910                         |           |         |        |
| Compound 4  |                          |                                | Direction |         |        |
| Axes        | $\alpha(\text{MK}^{-1})$ | $\sigma\alpha(\text{MK}^{-1})$ | a         | b       | c      |
| X1          | 21.7624                  | 1.6850                         | 1.0000    | 0.0000  | 1.0000 |
| X2          | 53.2469                  | 0.6224                         | 1.0000    | 0.0000  | 0.5000 |
| X3          | 92.6797                  | 1.4683                         | 0.0000    | -1.0000 | 0.0000 |
| V           | 169.3825                 | 2.8789                         |           |         |        |
| Compound 5  |                          |                                | Direction |         |        |
| Axes        | $\alpha(\text{MK}^{-1})$ | $\sigma\alpha(\text{MK}^{-1})$ | a         | b       | c      |
| X1          | -6.4204                  | 0.3494                         | 1.0000    | 0.0000  | 0.0000 |
| X2          | 56.5010                  | 3.7664                         | 0.5000    | 0.0000  | 1.0000 |
| X3          | 181.365                  | 4.7626                         | 0.0000    | 1.0000  | 0.0000 |
| V           | 233.9546                 | 8.0894                         |           |         |        |



## 6. Fourier-transform Infrared (IR) Absorption Spectroscopy

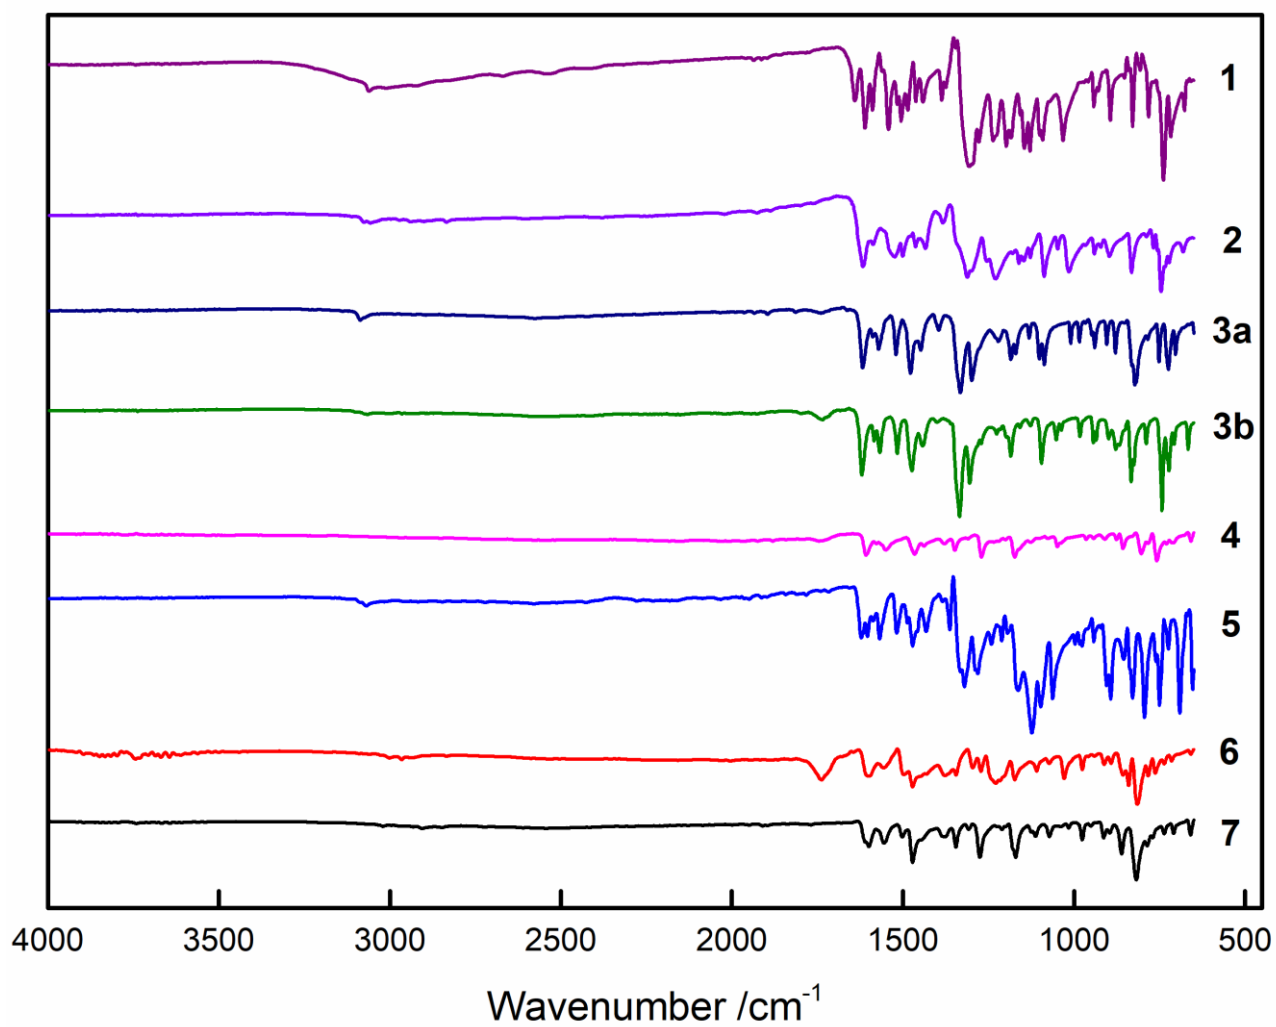

**Figure 6.** Fourier-transform infrared (IR) spectra for compounds 1–7.

## 7. Liquid-State $^1\text{H}$ , $^{13}\text{C}$ Nuclear Magnetic Resonance (NMR) Spectroscopy

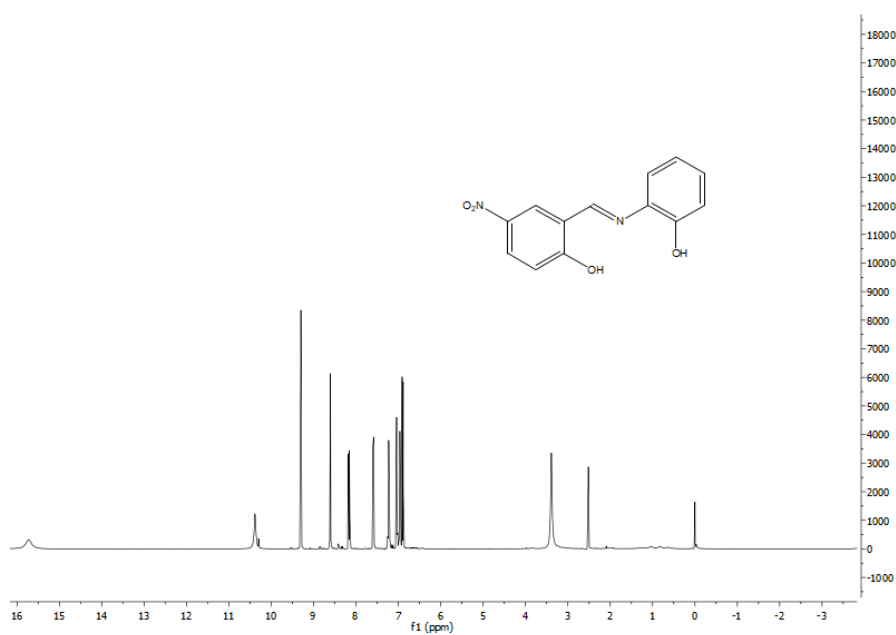

**Figure 7(a).** Liquid-state  $^1\text{H}$  NMR spectrum of compound **1** in  $\text{DMSO-}d_6$  at 298 K.

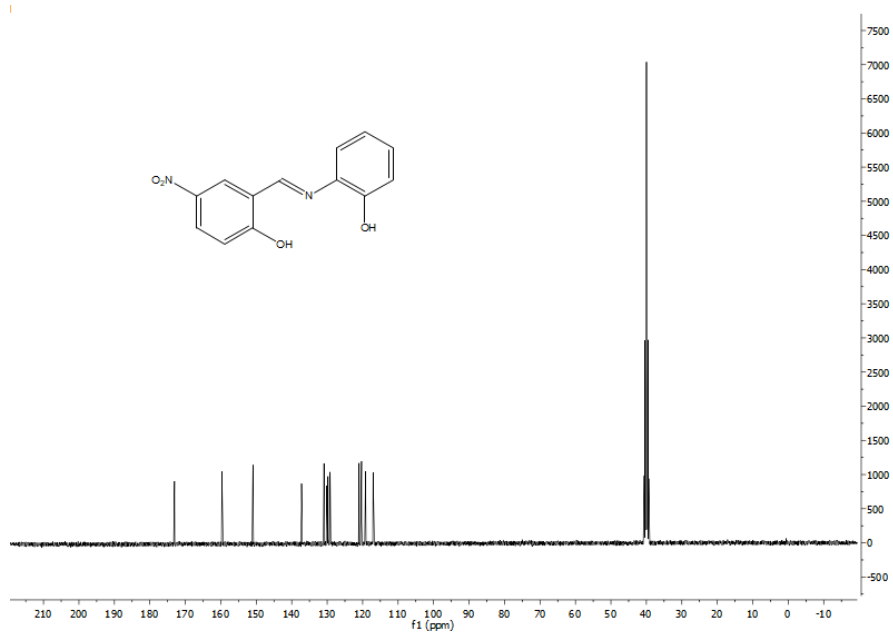

**Figure 7(b).** Liquid-state  $^{13}\text{C}$  NMR spectrum of compound **1** in  $\text{DMSO-}d_6$  at 298 K.

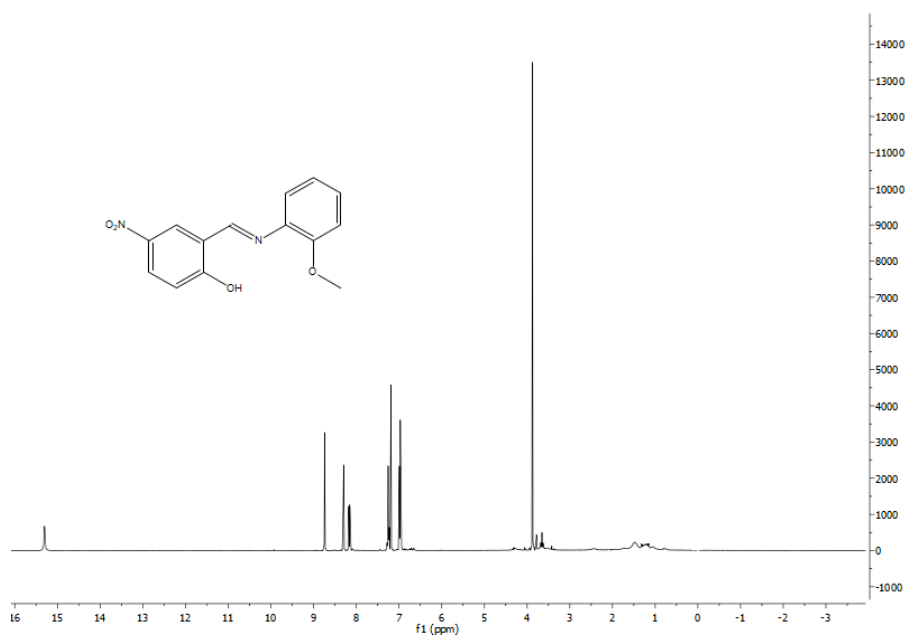

**Figure S7(c).** Liquid-state  $^1\text{H}$  NMR spectrum of compound **2** in  $\text{CDCl}_3$  at 298 K.

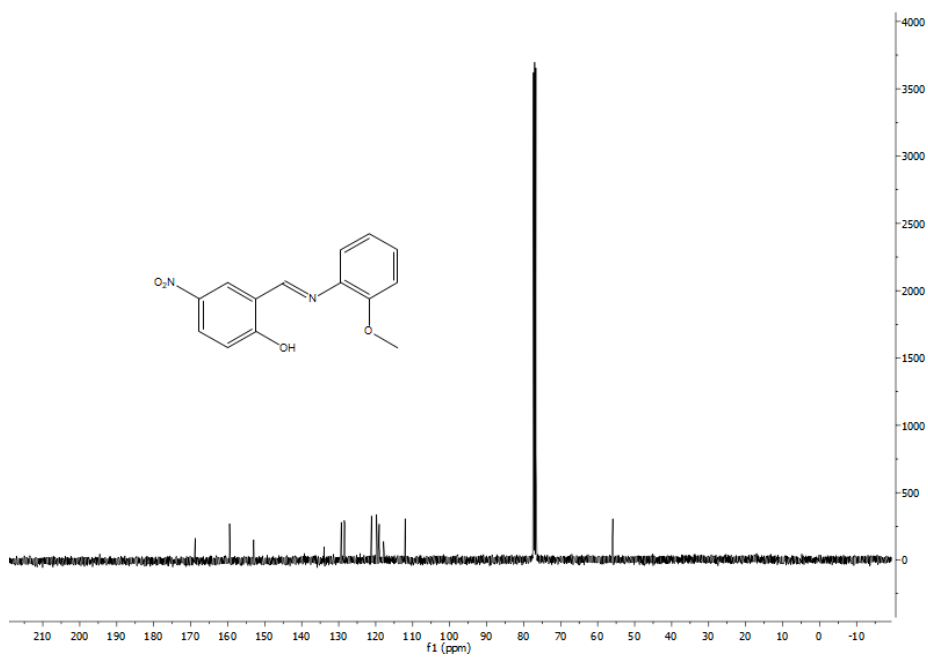

**Figure S7(d).** Liquid-state  $^{13}\text{C}$  NMR spectrum of compound **2** in  $\text{CDCl}_3$  at 298 K.

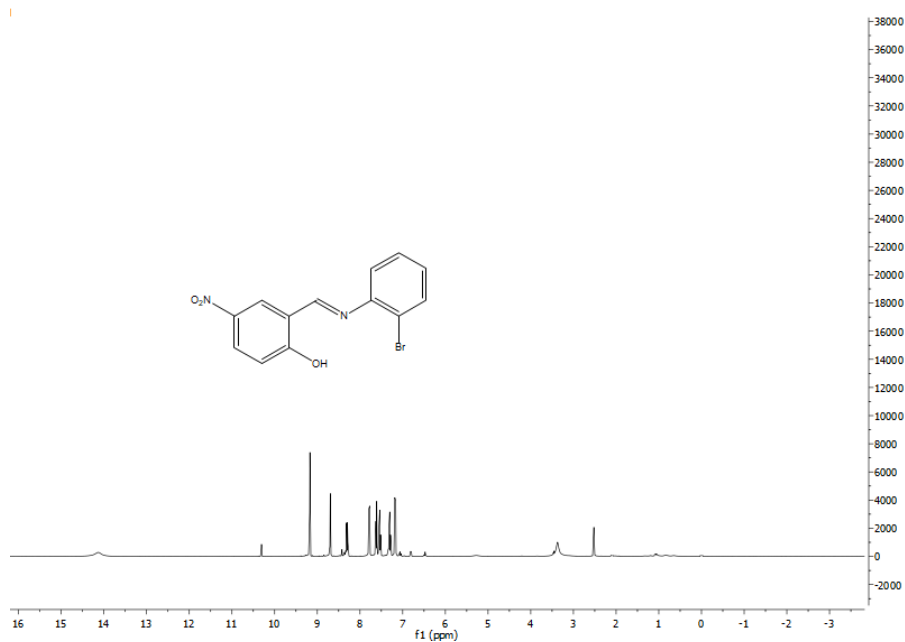

**Figure S7(e).** Liquid-state <sup>1</sup>H NMR spectrum of compound **3b** in CDCl<sub>3</sub> at 298 K.

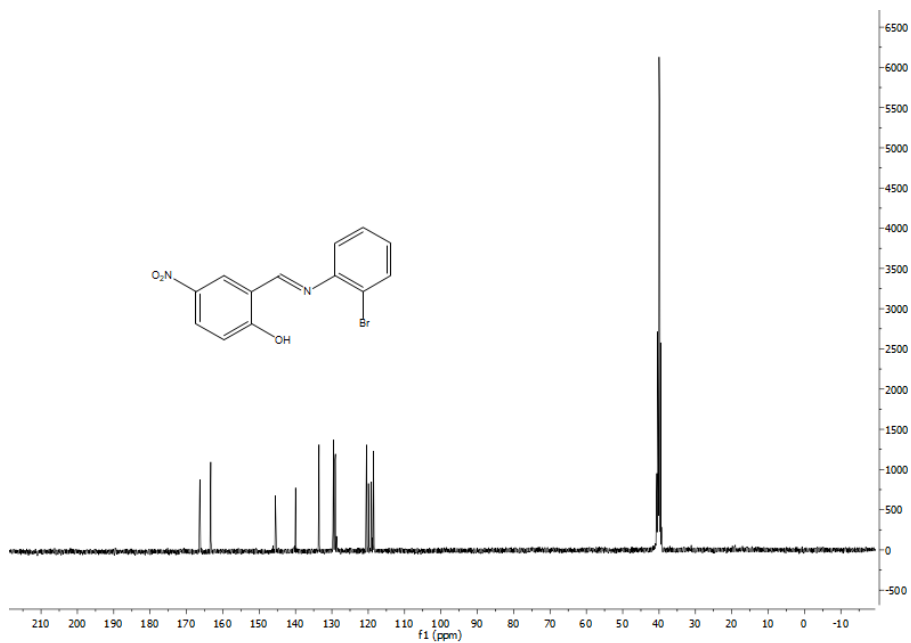

**Figure S7(f).** Liquid-state <sup>13</sup>C NMR spectrum of compound **3b** in DMSO-*d*<sub>6</sub> at 298 K.

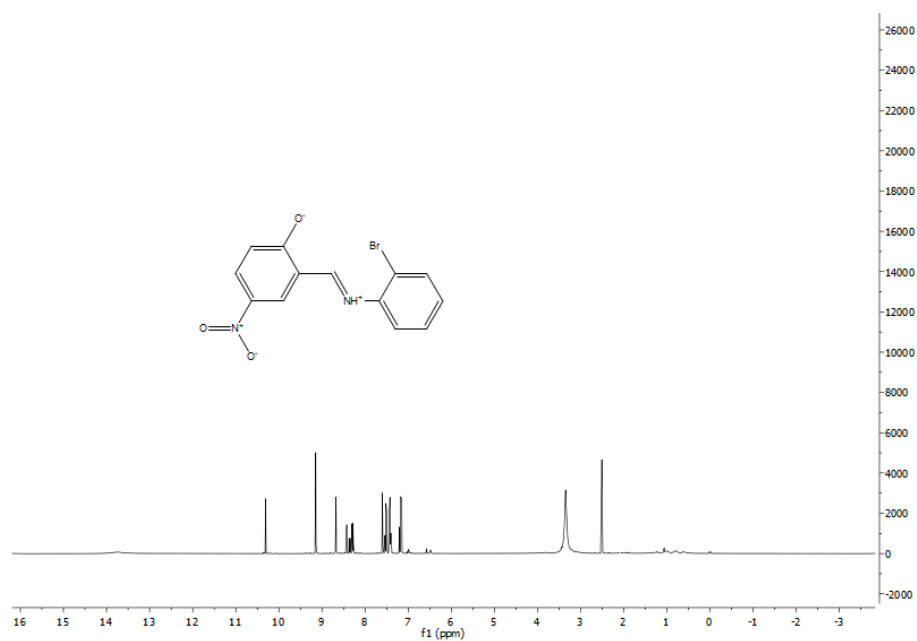

**Figure S7(g).** Liquid-state <sup>1</sup>H NMR spectrum of compound **3a** in CDCl<sub>3</sub> at 298 K.

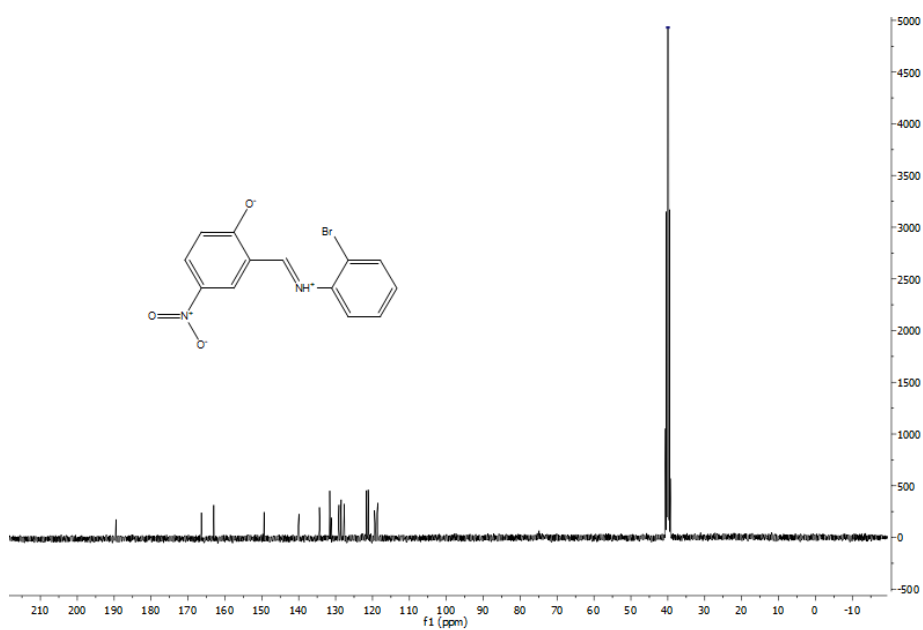

**Figure S7(h).** Liquid-state <sup>13</sup>C NMR spectrum of compound **3a** in DMSO-*d*<sub>6</sub> at 298 K.

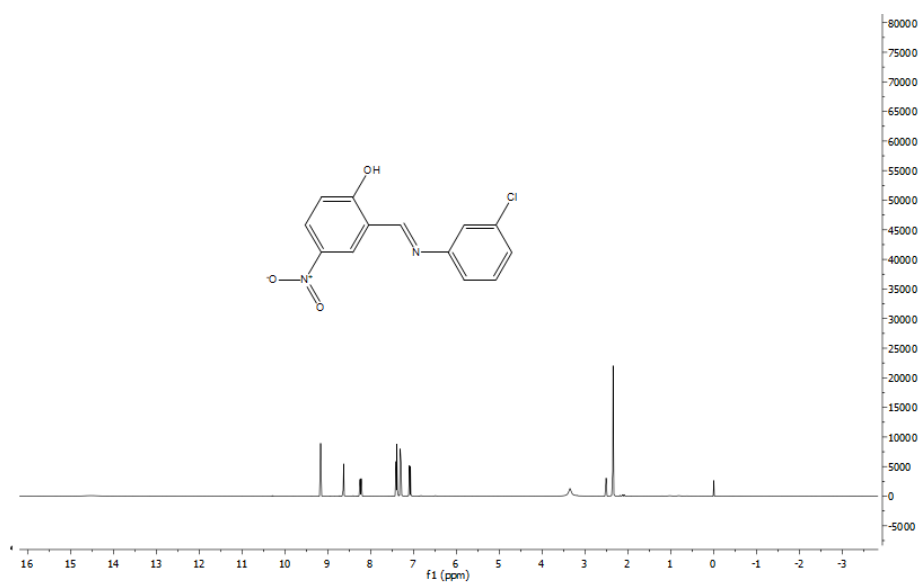

**Figure S7(i).** Liquid-state <sup>1</sup>H NMR spectrum of compound **4** in CDCl<sub>3</sub> at 298 K.

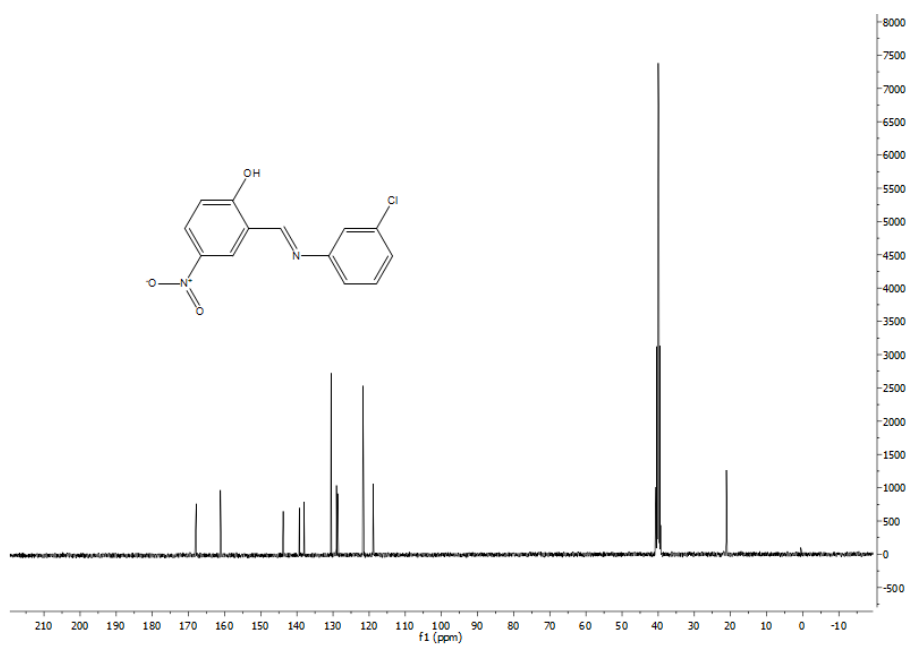

**Figure S7(j).** Liquid-state <sup>13</sup>C NMR spectrum of compound **4** in CDCl<sub>3</sub> at 298 K.

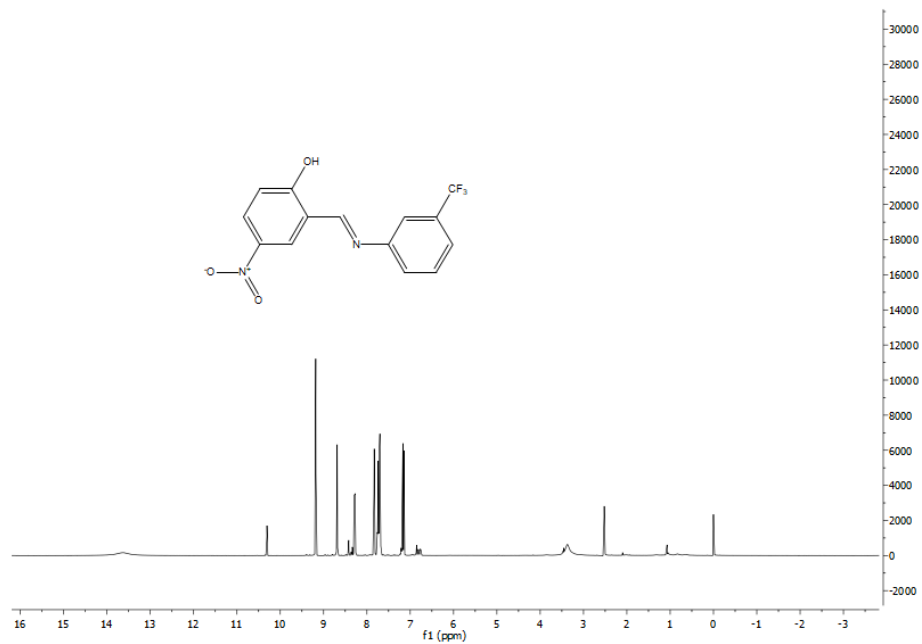

**Figure S7(k).** Liquid-state <sup>1</sup>H NMR spectrum of compound **5** in DMSO-*d*<sub>6</sub> at 298 K.

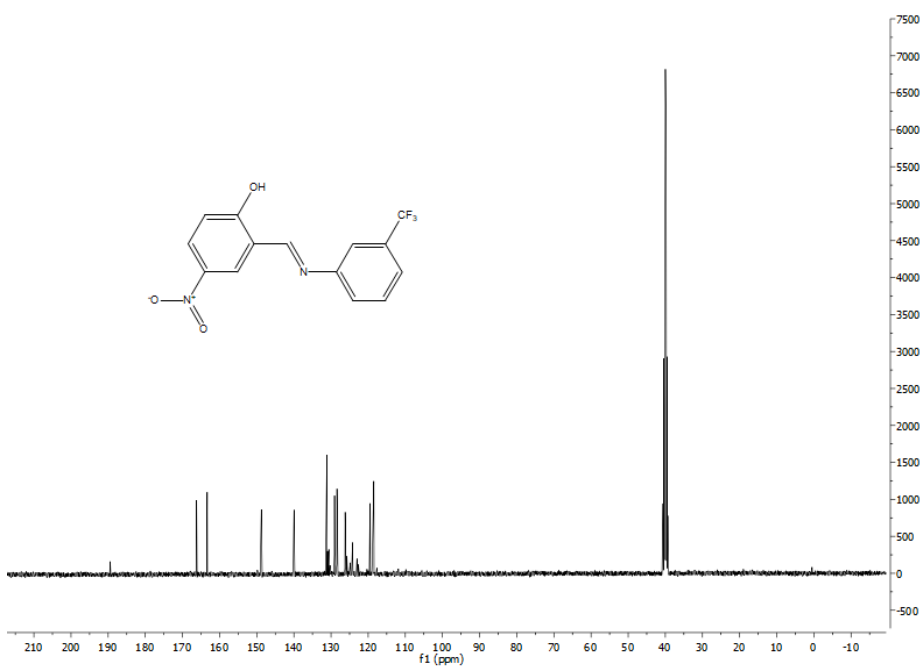

**Figure S7(l).** Liquid-state <sup>13</sup>C NMR spectrum of compound **5** in DMSO-*d*<sub>6</sub> at 298 K.

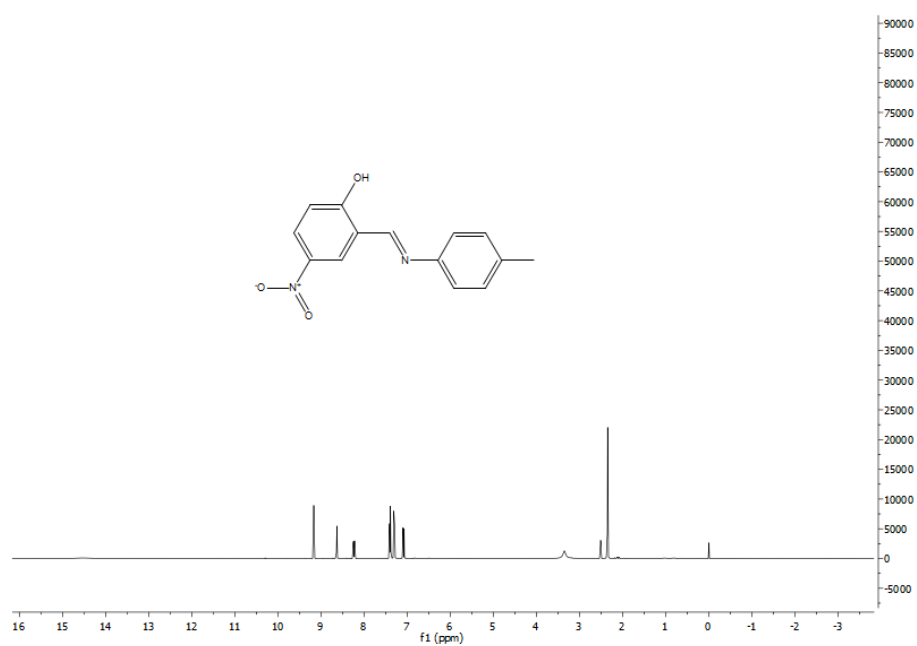

Figure S7(m). Liquid-state <sup>1</sup>H NMR spectrum of compound 6 in CDCl<sub>3</sub> at 298 K.

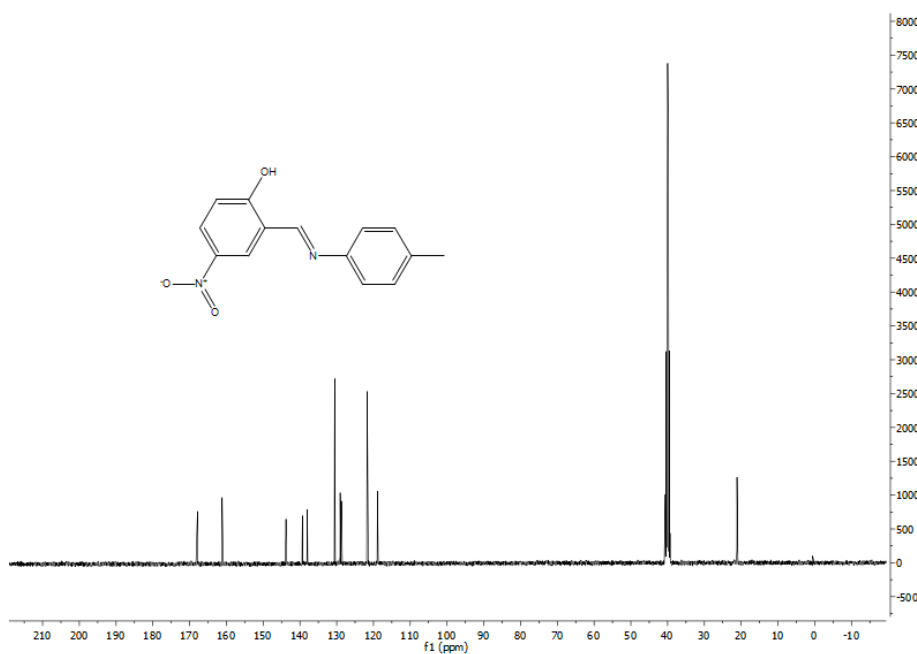

Figure S7(n). Liquid-state <sup>13</sup>C NMR spectrum of compound 6 in DMSO-*d*<sub>6</sub> at 298 K.



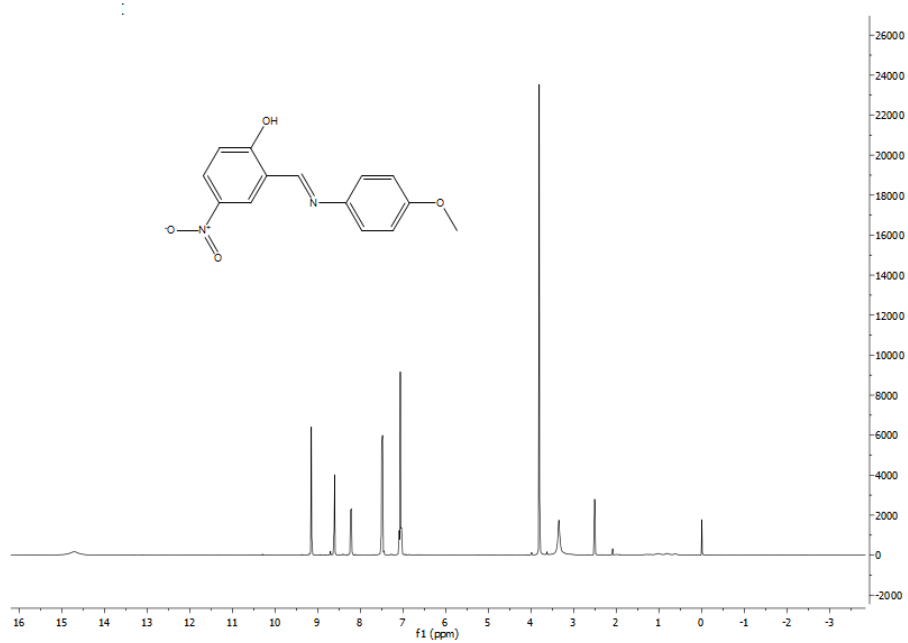

**Figure S7(o)** Liquid-state  $^1\text{H}$  NMR spectrum of compound 7 in  $\text{DMSO-}d_6$  at 298 K.

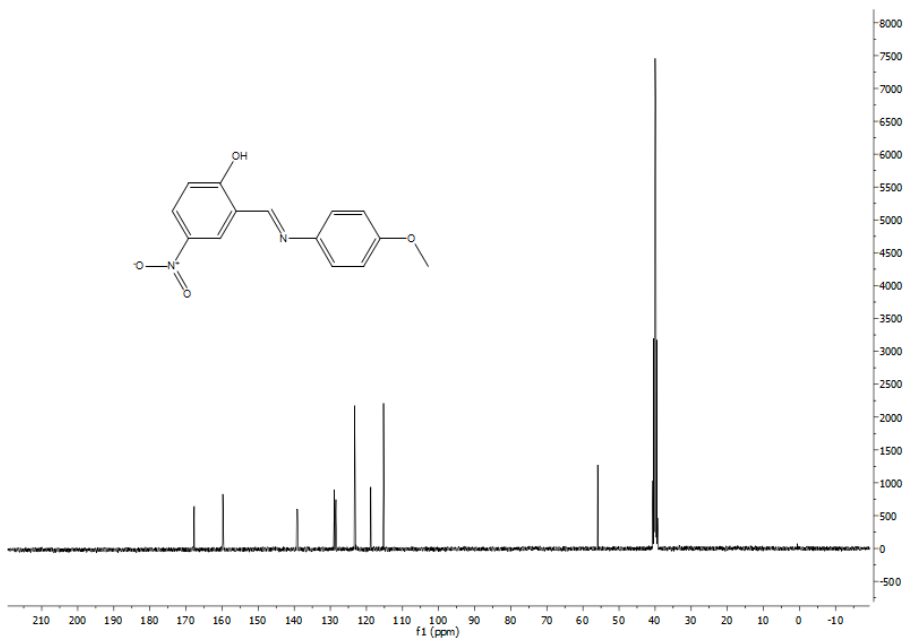

**Figure S7(p)** Liquid-state  $^{13}\text{C}$  NMR spectrum of compound 7 in  $\text{DMSO-}d_6$  at 298 K.

## 8. Mass Spectroscopy

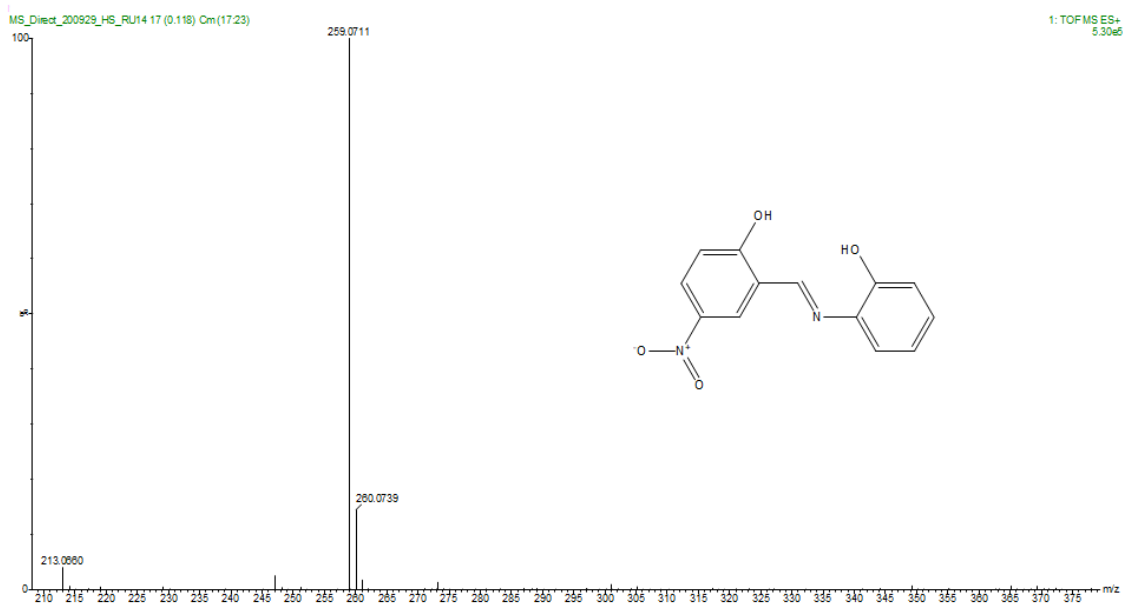

Figure S8(a). Mass spectrum (MS) for compound 1.

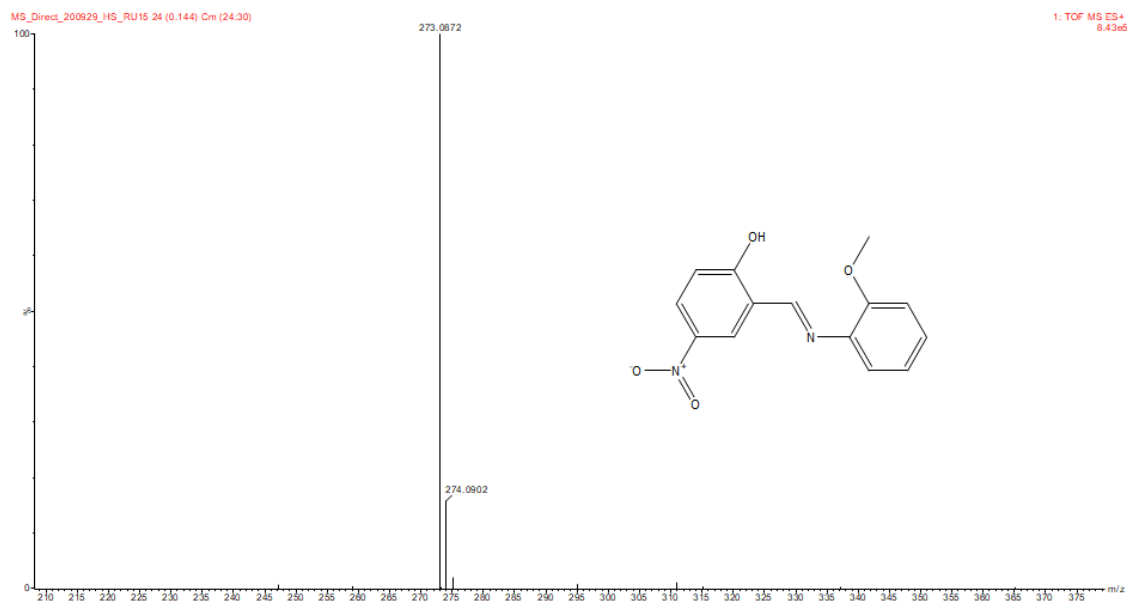

Figure S8(b). Mass spectrum (MS) for compound 2.

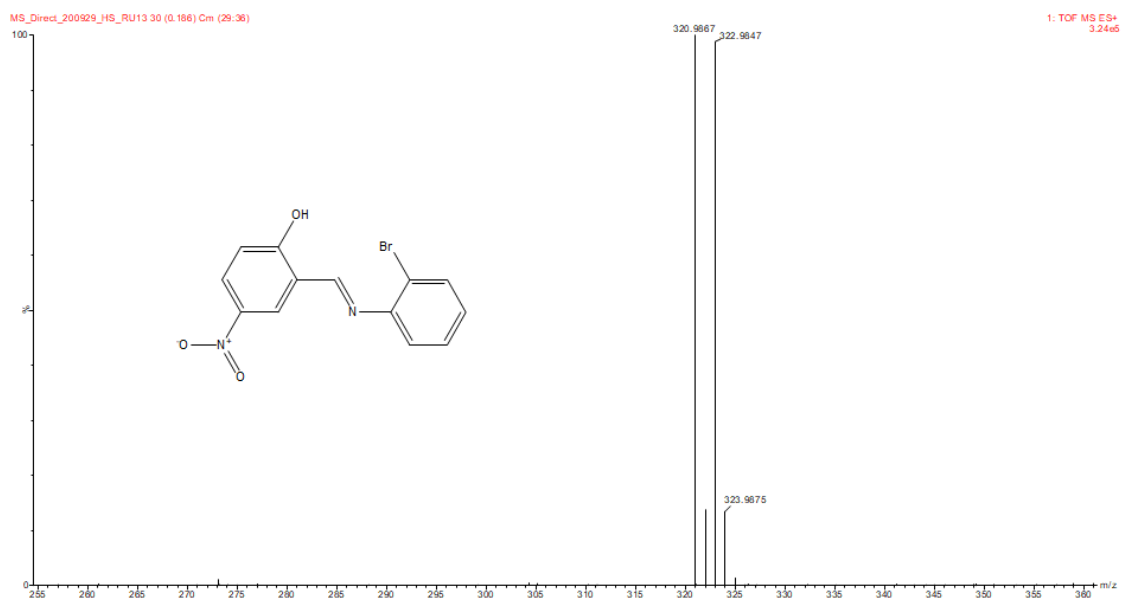

Figure S8(c). Mass spectrum (MS) for compound **3b**.

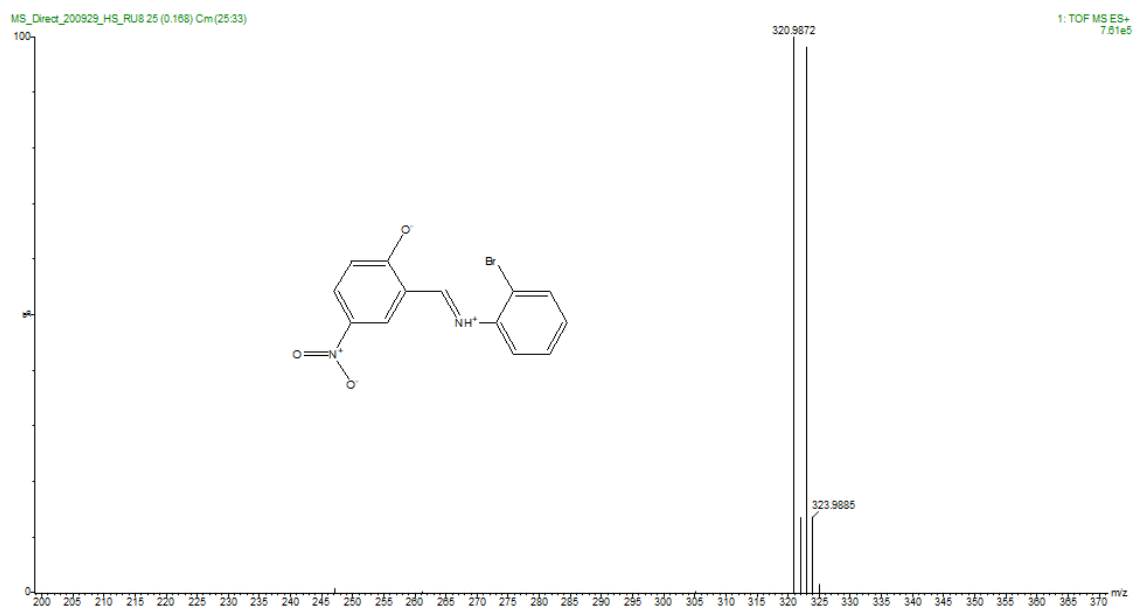

Figure S8(d). Mass spectrum (MS) for compound **3a**.

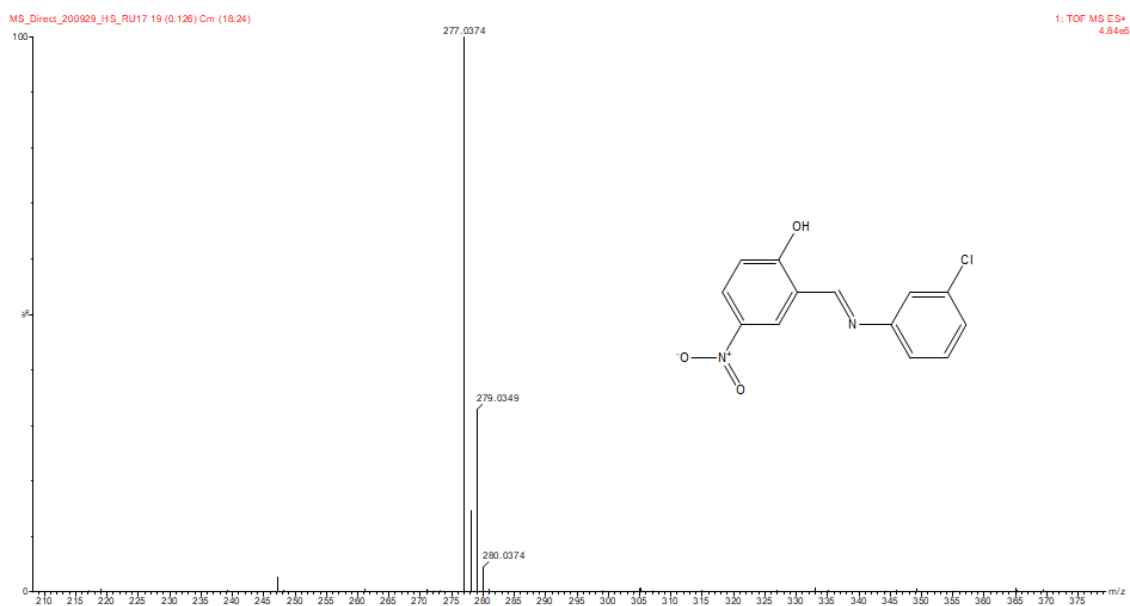

Figure S8(e). Mass spectrum (MS) for compound 4.

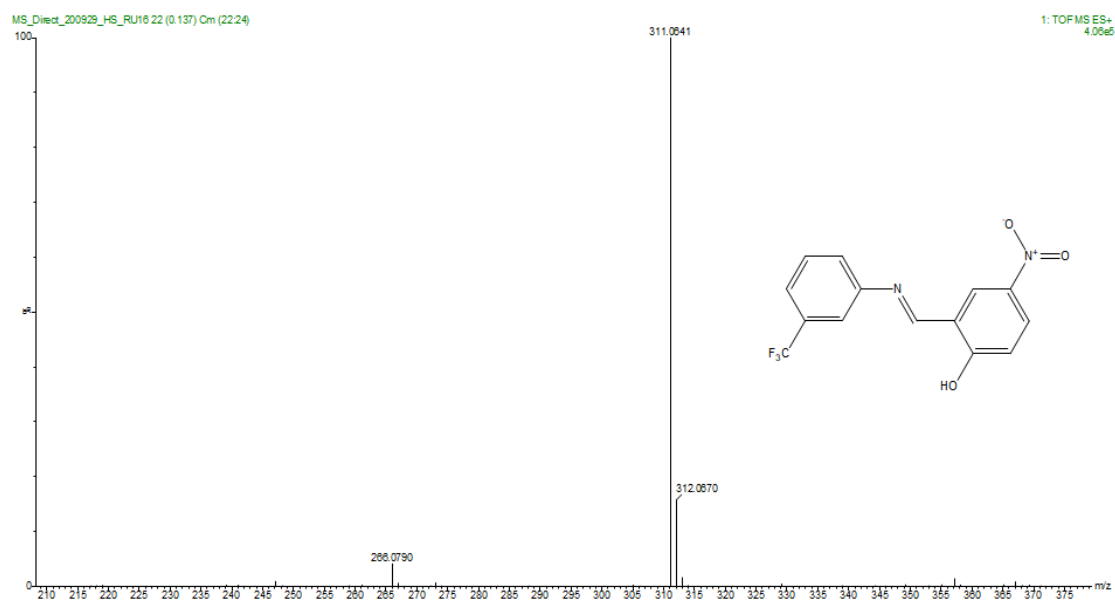

Figure S8(f). Mass spectrum (MS) for compound 5.

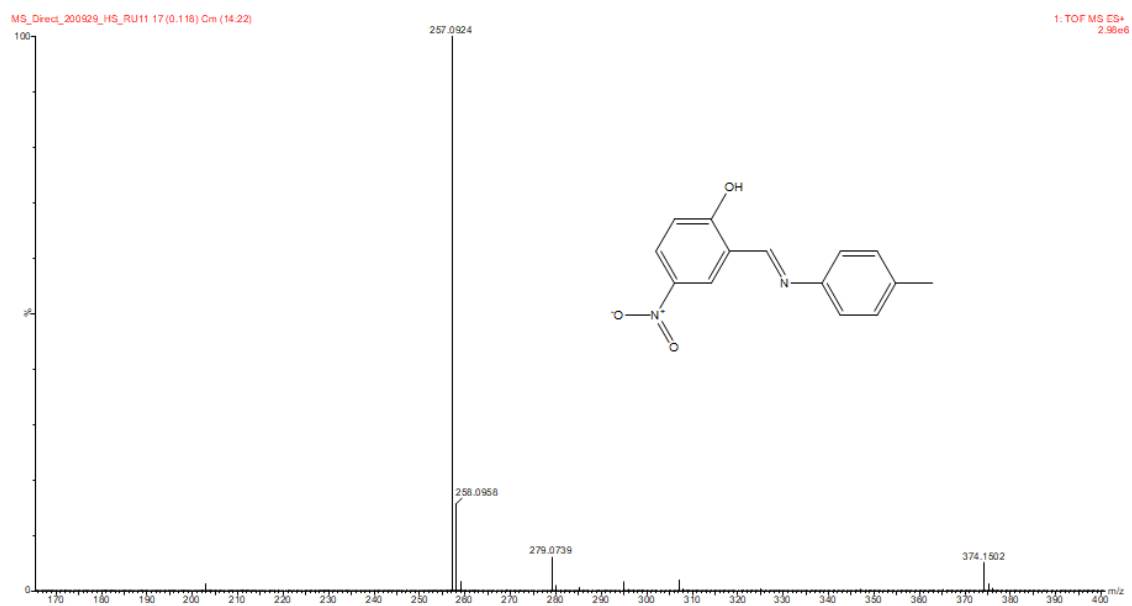

**Figure S8(g).** Mass spectrum (MS) for compound 6.

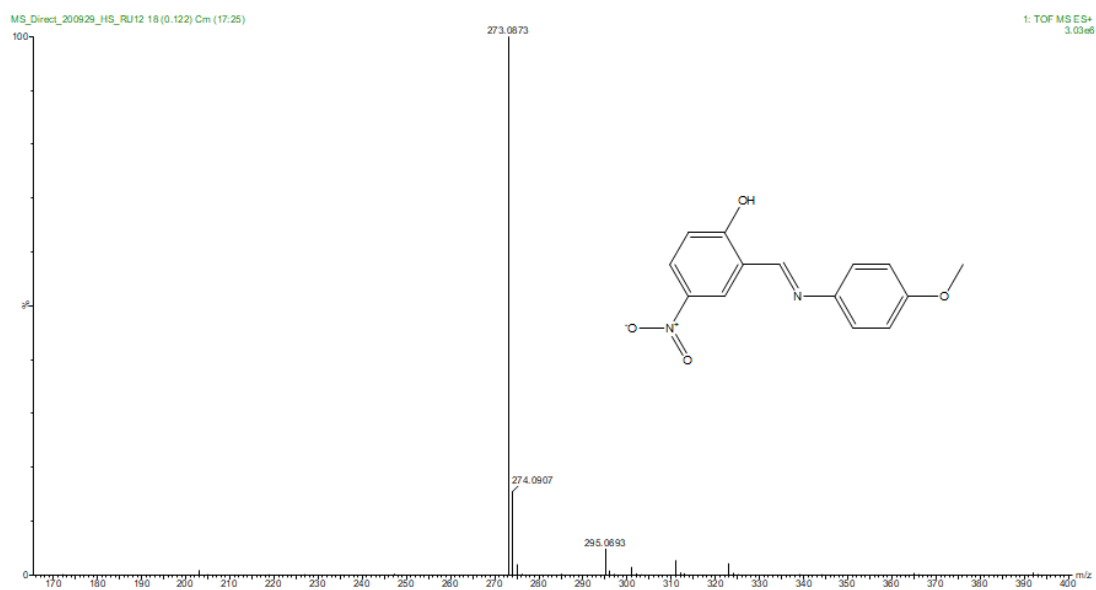

**Figure S8(h).** Mass spectrum (MS) for compound 7.

## 9. Solid-State Absorption Ultraviolet Visible Spectroscopy

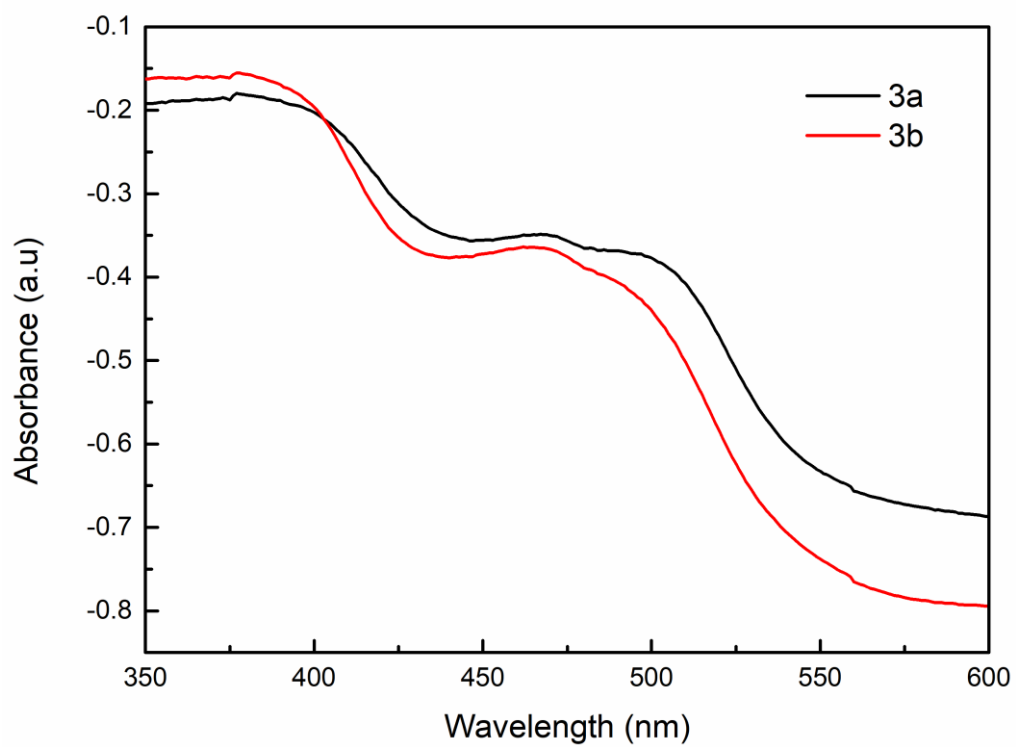

**Figure S9.** Solid-state ultraviolet-visible spectra for compounds **3a** and **3b**.

## 10. Differential Scanning Calorimetry (DSC) Measurements

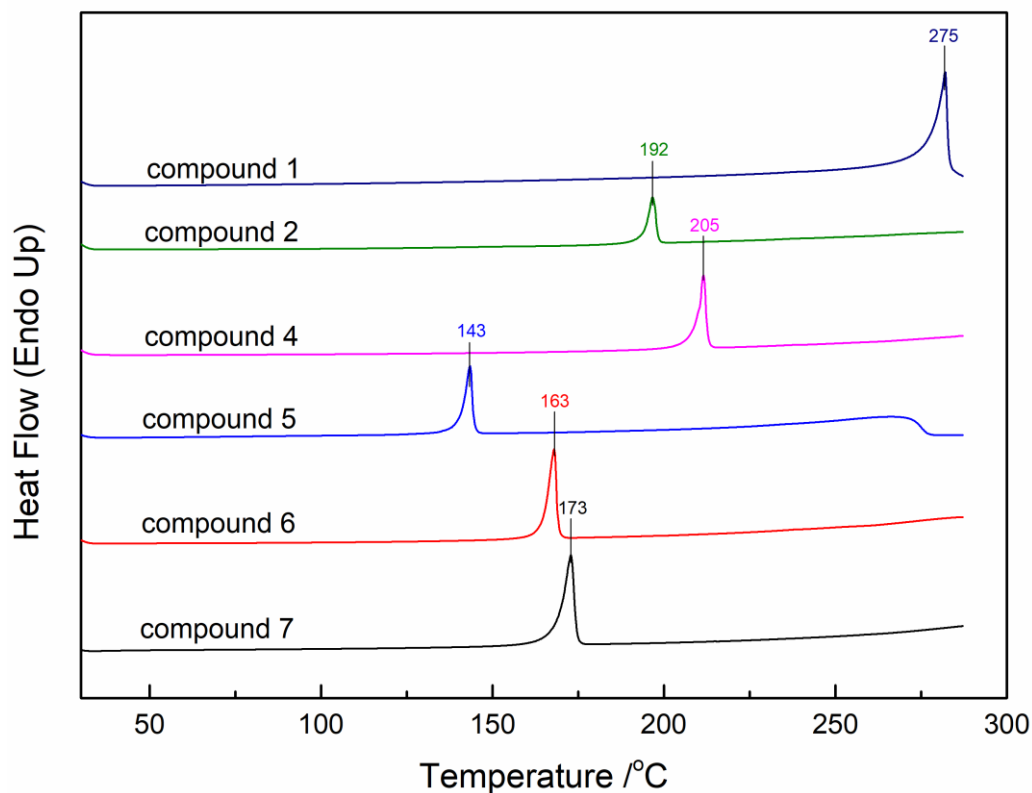

**Figure S10(a).** DSC curves (Endotherm Up and Exotherm Down) showing melting points of compounds **1** (275 °C or 573 K), **2** (192 °C or 490 K), **4** (205 °C or 503 K), **5** (143 °C or 441 K), **6** (163 °C or 461 K) and **7** (173 °C or 471 K).

## 11. References

1. A. L. Spek, PLATON, molecular geometry program, *J. Appl. Crystallogr.* 2003, **36**, 7–13.
2. C. F. Macrae, I. J. Bruno, J. A. Chisholm, P. R. Edgington, P. McCabe, E. Pidcock, L. Rodriguez-Monge, R. Taylor, J. van de Streek, P. A. Wood, *J. Appl. Crystallogr.* 2008, **41**, 466–470.
3. M. J. Cliffe, A. L. Goodwin, *PASCal: A Principal Axis Strain Calculator for Thermal Expansion and Compressibility Determination. J. Appl. Crystallogr.* 2012, **45**, 1321–1329.
